# Supplementary material for: Nannochloropsis Genomes Reveal Evolution of Microalgal Oleaginous Traits
Source: PLoS Genet. 2014 Jan 9;10(1):e1004094. doi: 10.1371/journal.pgen.1004094 (PMC3886936; doi:10.1371/journal.pgen.1004094)
Supplement: Dataset S1 — Candidate nuclear-genome phylogenetic markers in Nannochloropsis. (XLS) [file pgen.1004094.s001.xls]

## Sheet: test4
Dataset S1. Candidate nuclear-genome phylogenetic markers in Nannochloropsis.
OG ID	Interspecies SNP (%)	Intraspecies SNP (%)	Gene model in N.oceanica IMET1	Annotation
nanno_new2787	21.8	1	scaffold00069.g2388	Charged multivesicular body protein 2A
nanno_new3236	29.7	1	oz_1rps3_mt	ribosomal protein S3
nanno_new2920	32.1	1	scaffold00096.g3662	kinetochore associated 2
nanno_new2540	37.7	1	scaffold00043.g1748	U3 small nucleolar ribonucleoprotein
nanno_new2981	32.7	1.1	scaffold00182.g5453	pyruvate, phosphate dikinase
nanno_new2983	34.6	1.1	scaffold00082.g2962	NADPH:adrenodoxin oxidoreductase
nanno_new2878	26.5	1.2	scaffold00341.g9733	Light harvesting complex protein
nanno_new2768	30.4	1.2	scaffold00214.g6067
nanno_new2821	27.8	1.3	scaffold00007.g291	eukaryotic initiation factor 3H1 subunit
nanno_new2569	30	1.3	scaffold00267.g7608	Glutamyl-tRNA Reductase, chloroplast precursor
nanno_new2328	30.2	1.3	scaffold00026.g1457	conserved unknown protein
nanno_new2558	33.8	1.3	scaffold00259.g7450	cellulase 1
nanno_new2068	37.8	1.4	scaffold00084.g3215
nanno_new2174	29	1.5	scaffold00330.g9539	Methyltransferase type 11
nanno_new2816	31.1	1.5	scaffold00145.g5115	molybdopterin biosynthesis protein MoeB
nanno_new2627	33	1.5	scaffold00330.g9480	CDK5 regulatory subunitassociated protein 1
nanno_new2253	36	1.5	scaffold00095.g3370	Glycine cleavage T-protein (aminomethyl transferase)
nanno_new2904	24.6	1.6	scaffold00295.g8387	Plastid ribosomal protein S1
nanno_new2552	29.6	1.6	scaffold00259.g7294	FAD-linked oxidoreductase
nanno_new2950	38.8	1.6	scaffold00009.g598
nanno_new2148	32.7	1.8	scaffold00341.g9799	transaldolase
nanno_new2340	21.8	1.9	scaffold00259.g7398	CAB/ELIP/HLIP superfamily of protein
nanno_new2439	26.4	2	scaffold00145.g5112	S-adenosylmethionine:diacylglycerol 3-amino-3-carboxypropyl transferase
nanno_new3002	27.1	2.5	scaffold00009.g445	cytochrome P450, carotenoid hydroxylase
nanno_new2255	37	4.1	scaffold00095.g3389	Cytochrome P450 family protein
