# Supplementary material for: Nannochloropsis Genomes Reveal Evolution of Microalgal Oleaginous Traits
Source: PubMed Central journal article supplement (PMC3886936; doi:10.1371/journal.pgen.1004094), 2014-01-09
Supplement: pgen.1004094.s008.pdf [file pgen.1004094.s008.pdf]

**A**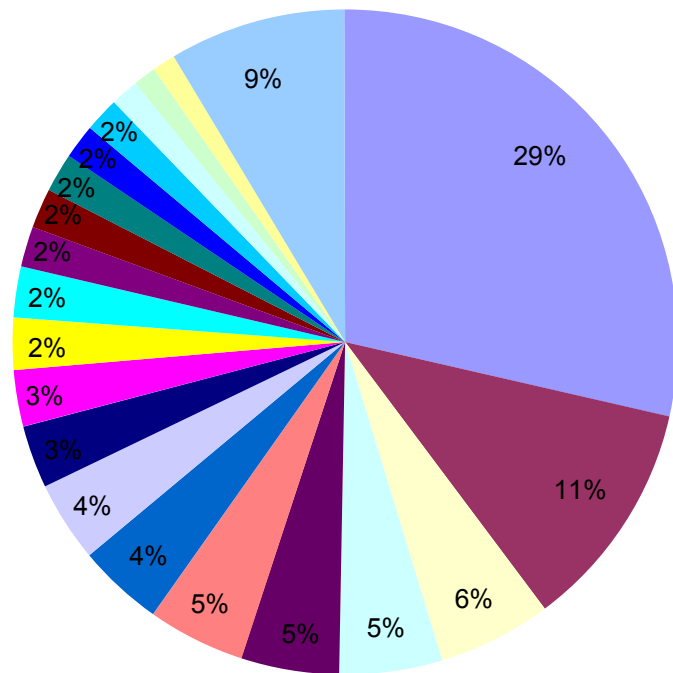

- ion binding
- oxidoreductase activity
- structural constituent of ribosome
- ATPase activity
- DNA binding
- transmembrane transporter
- kinase activity
- peptidase activity
- ligase activity
- RNA binding
- lyase activity
- isomerase activity
- helicase activity
- GTPase activity
- methyltransferase activity
- transferase activity, transferring acyl groups
- nucleotidyltransferase activity
- unfolded protein binding
- translation factor activity, nucleic acid binding
- phosphatase activity
- others

**B**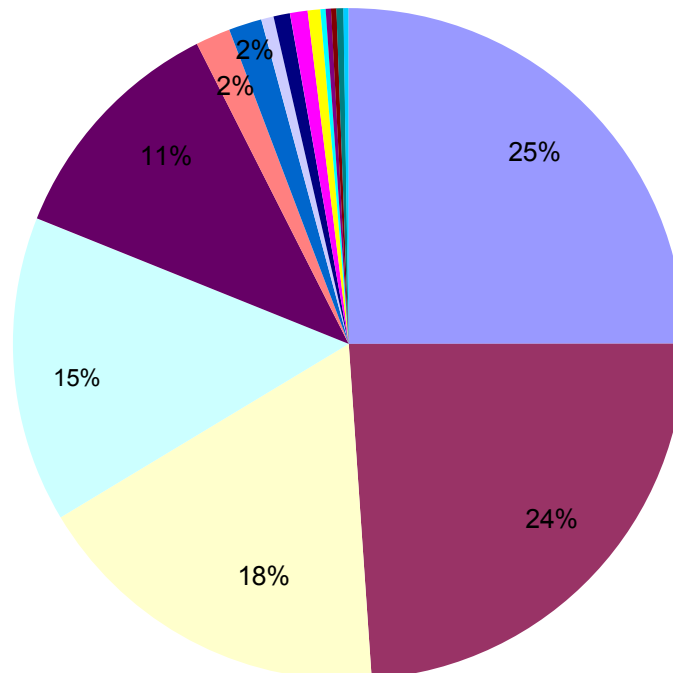

- protein complex
- intracellular
- ribosome
- cytoplasm
- nucleus
- chromosome
- plastid
- thylakoid
- organelle
- nucleolus
- plasma membrane
- peroxisome
- mitochondrion
- endoplasmic reticulum
- nuclear chromosome
- Golgi apparatus
- cytoskeleton
