# Supplementary material for: Nannochloropsis Genomes Reveal Evolution of Microalgal Oleaginous Traits
Source: PubMed Central journal article supplement (PMC3886936; doi:10.1371/journal.pgen.1004094), 2014-01-09

**A**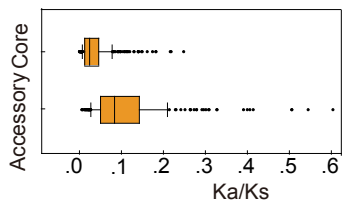**C**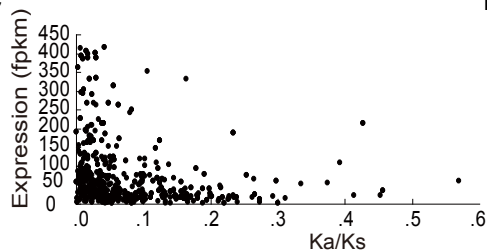**D**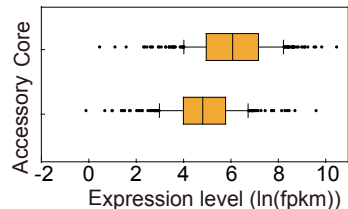**B**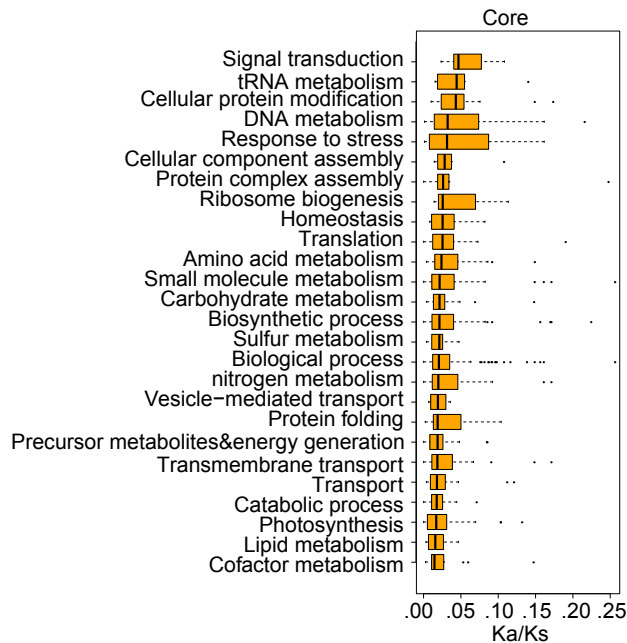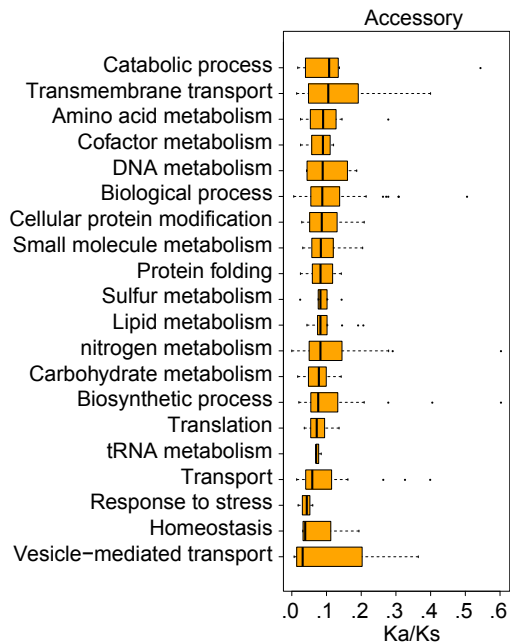

Supplement: pgen.1004094.s011.pdf [file pgen.1004094.s011.pdf]
