# Supplementary material for: Nannochloropsis Genomes Reveal Evolution of Microalgal Oleaginous Traits
Source: PubMed Central journal article supplement (PMC3886936; doi:10.1371/journal.pgen.1004094), 2014-01-09

A

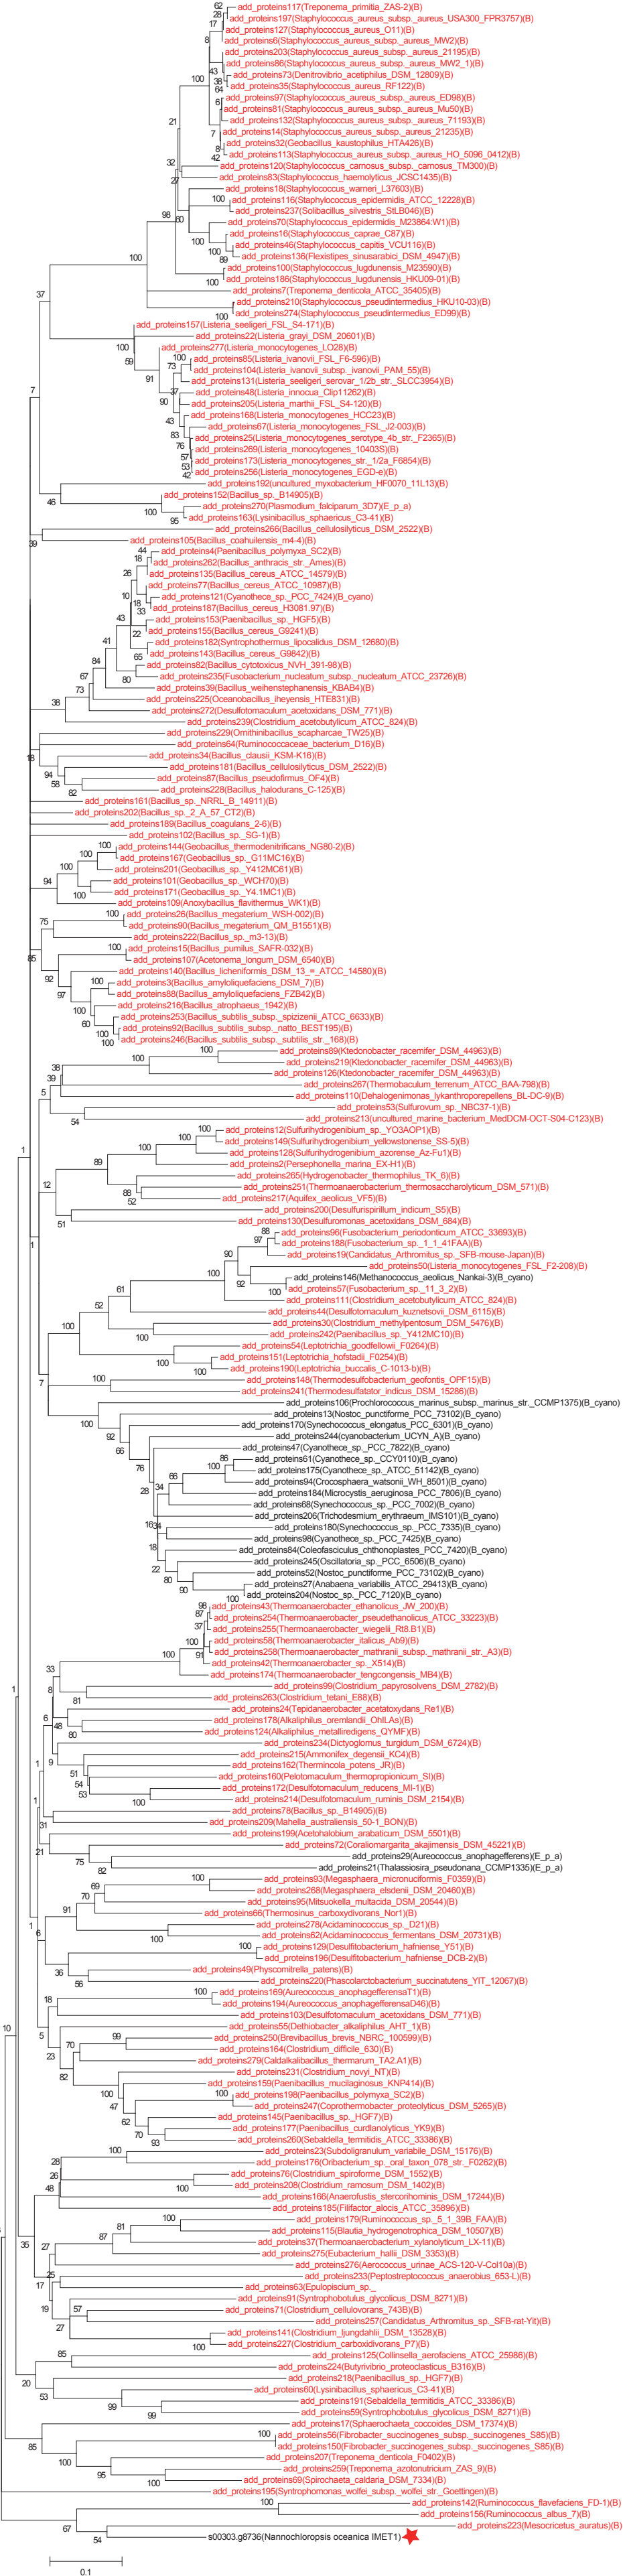

**B**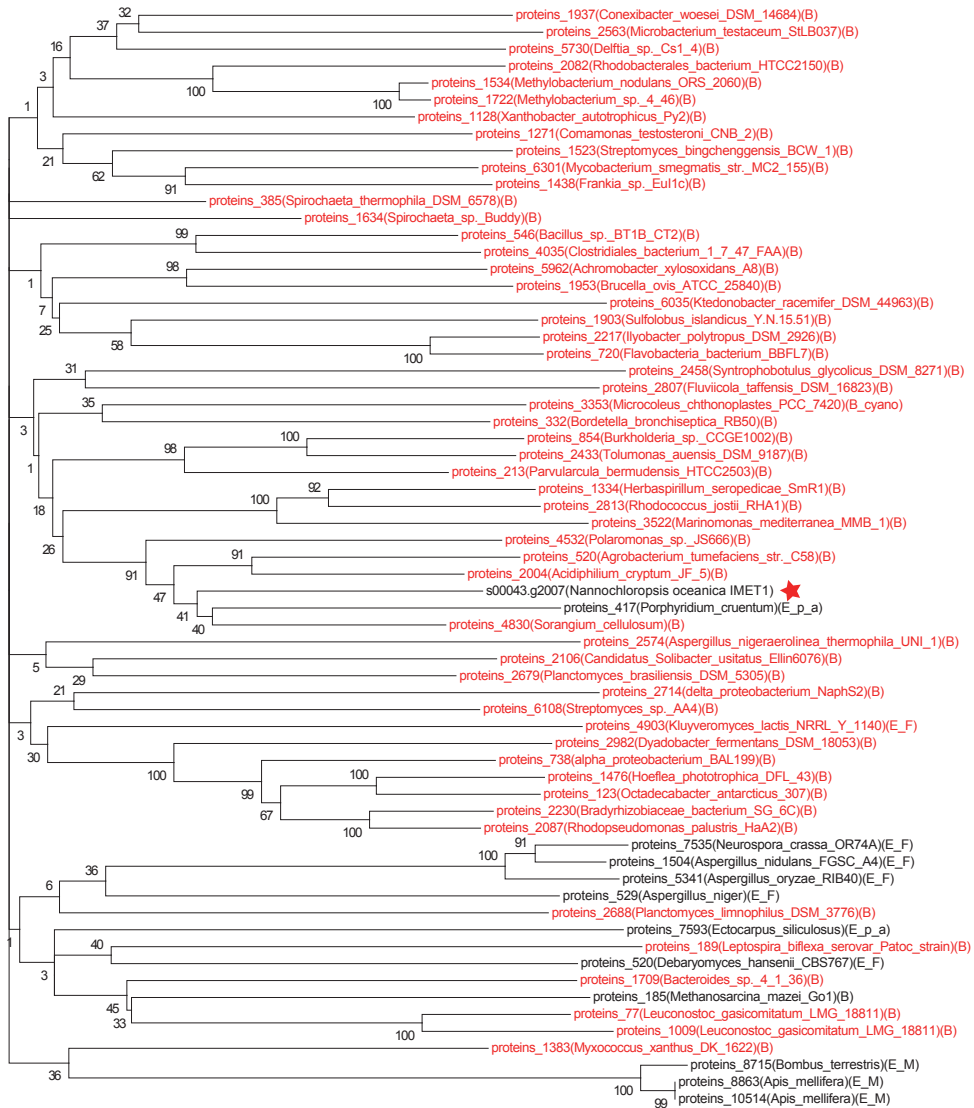

0.1

C

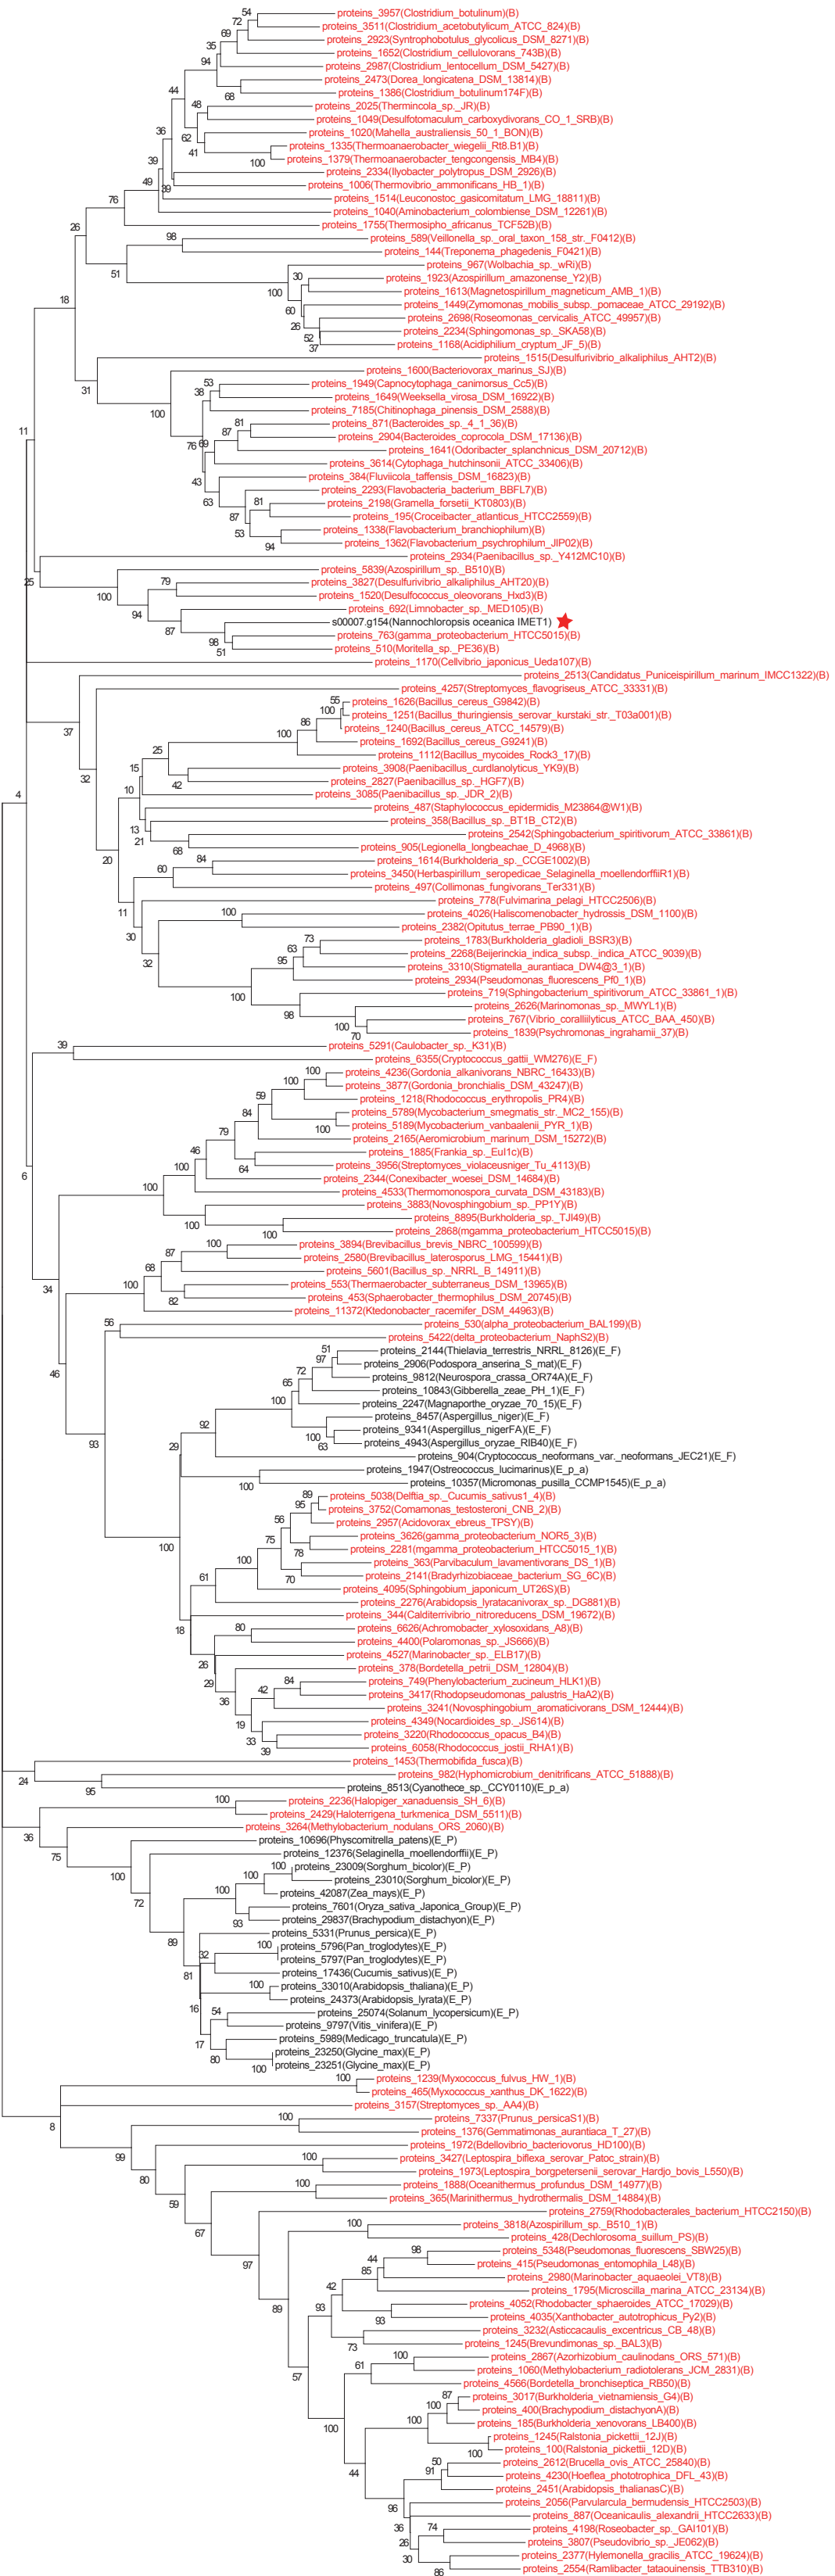

0.1



C

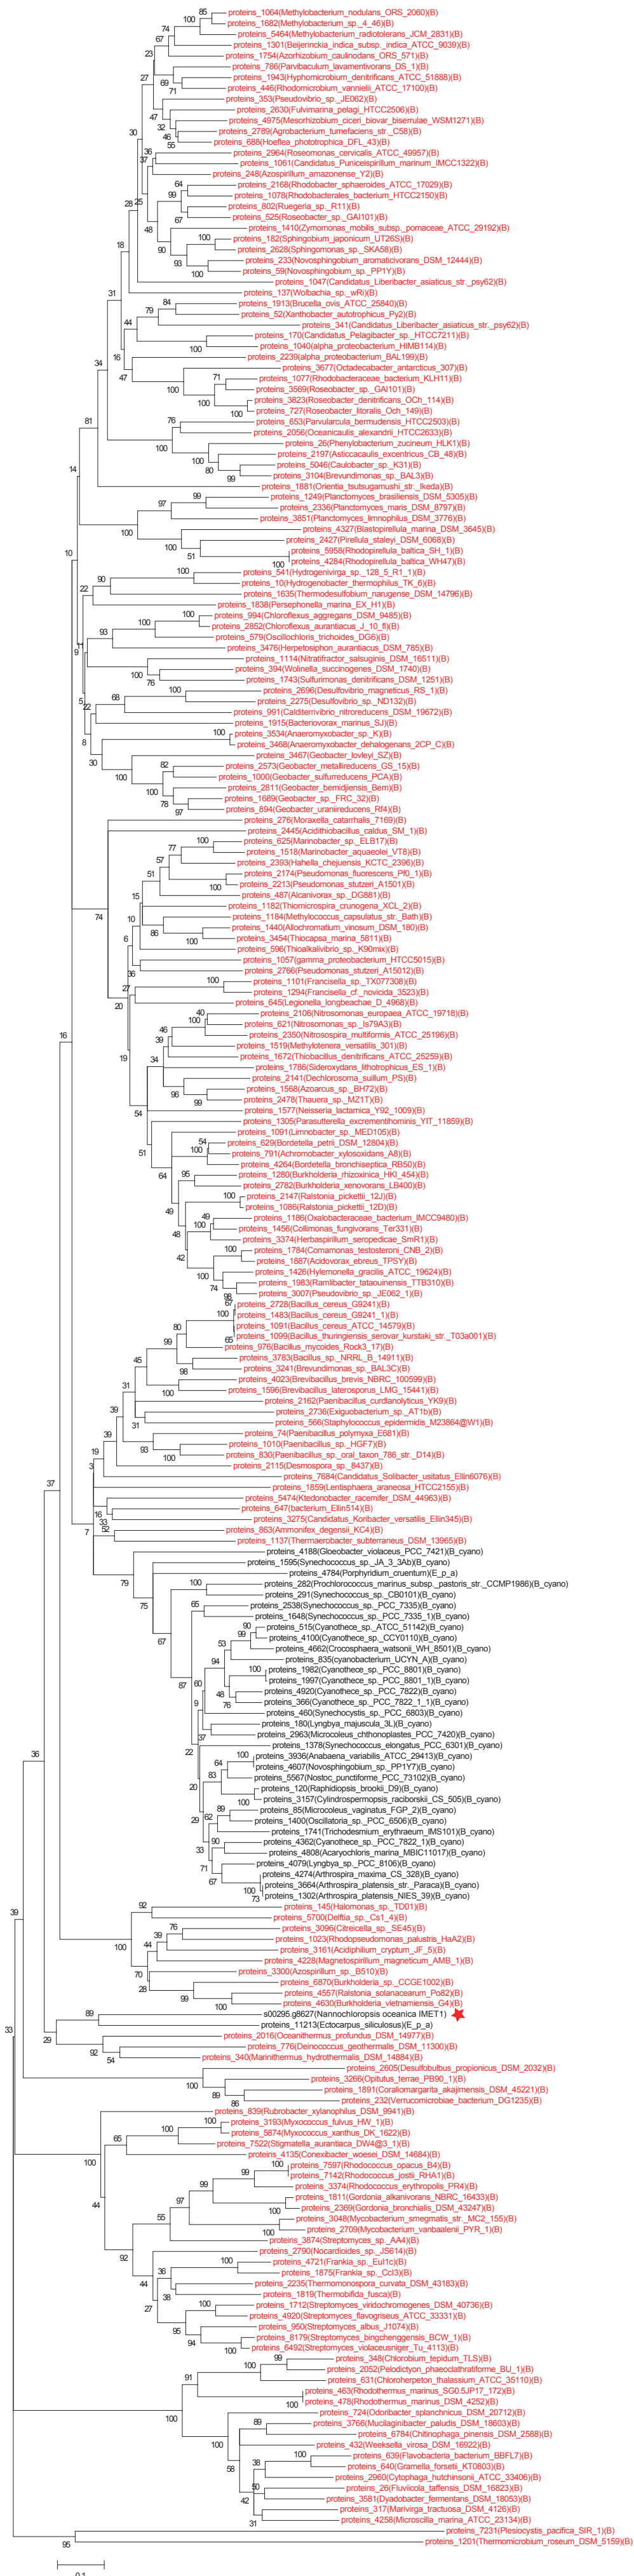

0.1







**E**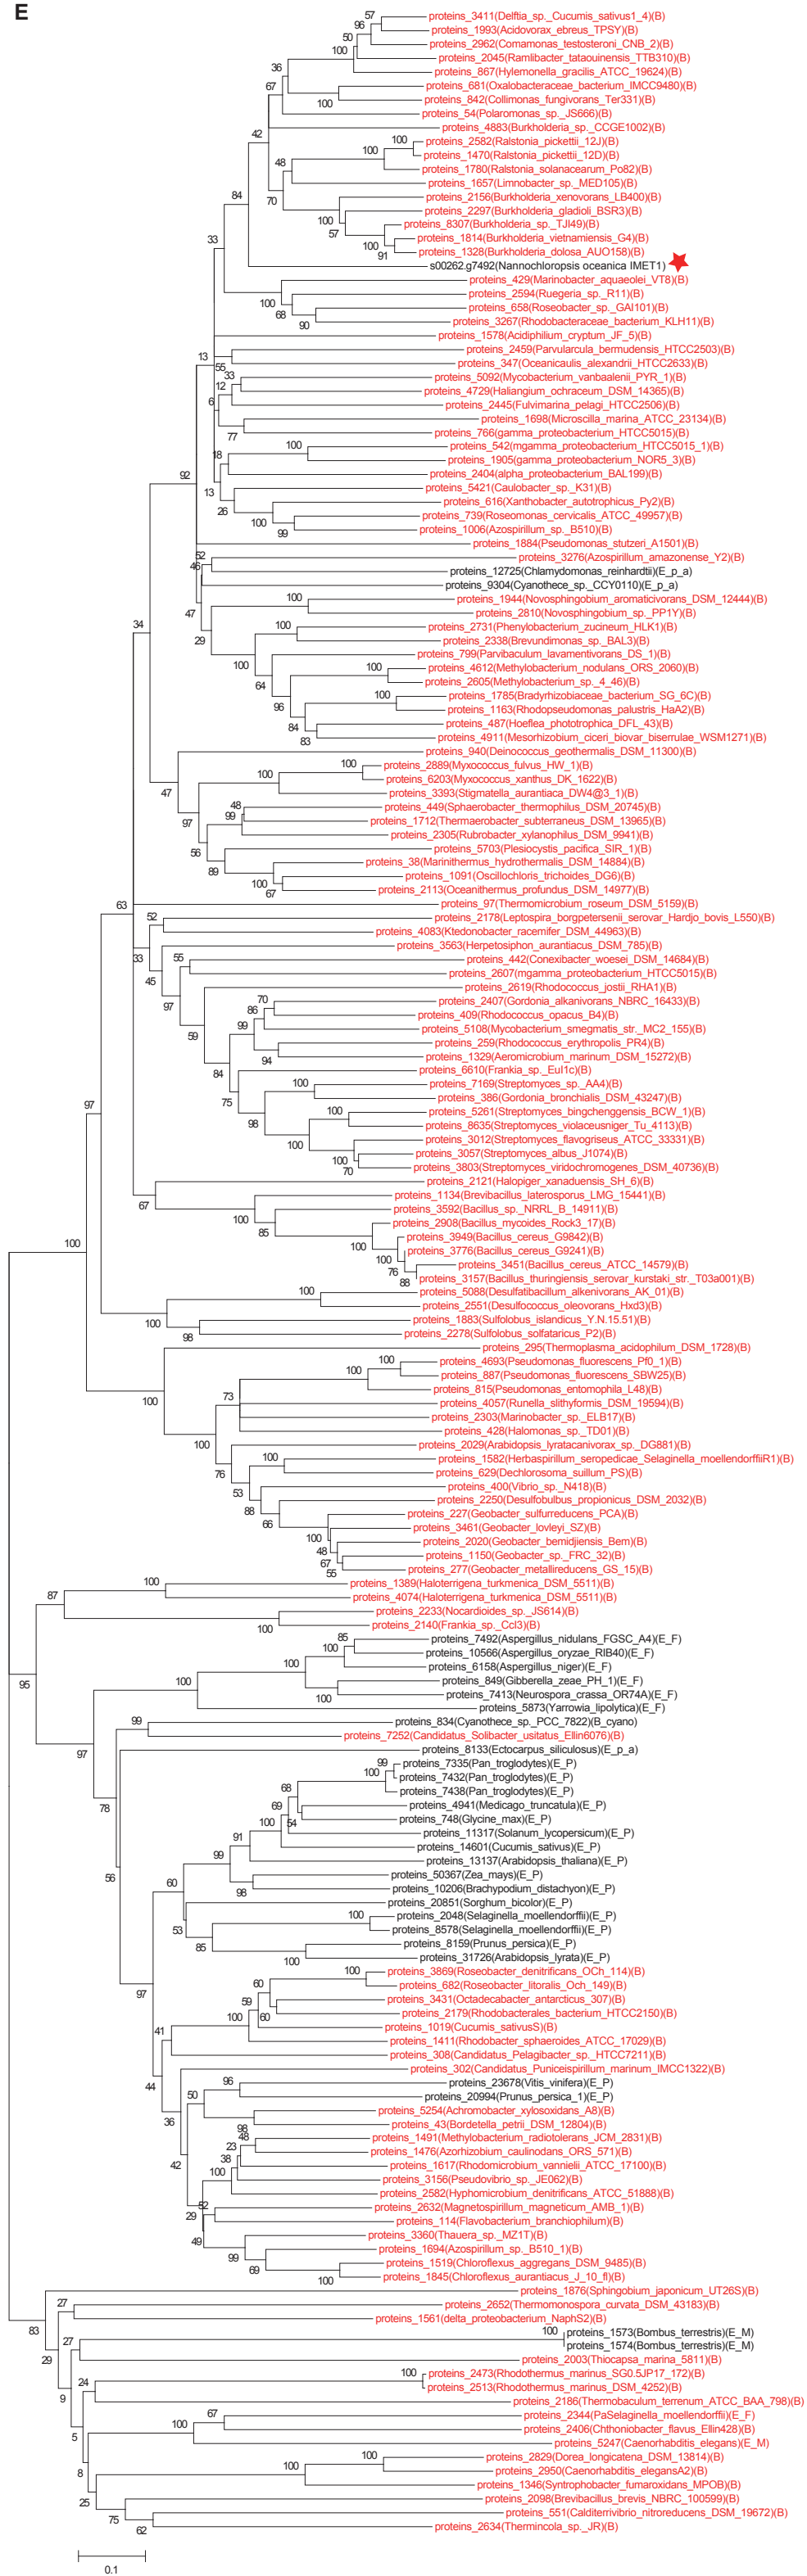

E

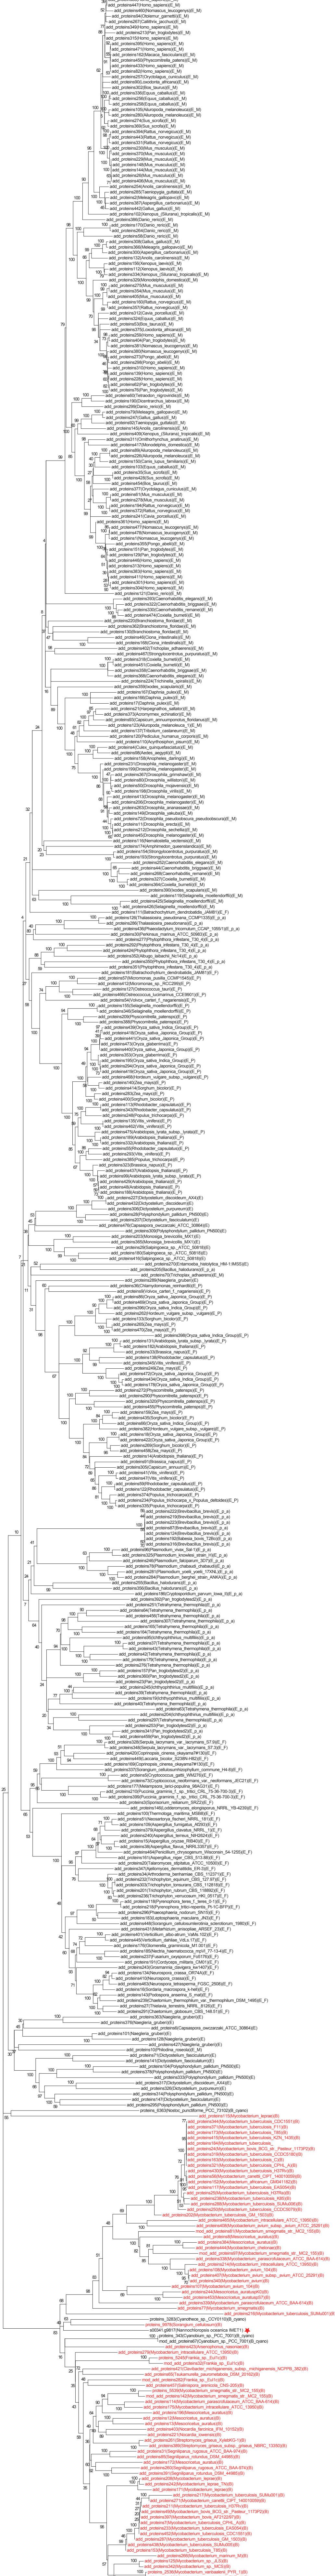

0.1



**F**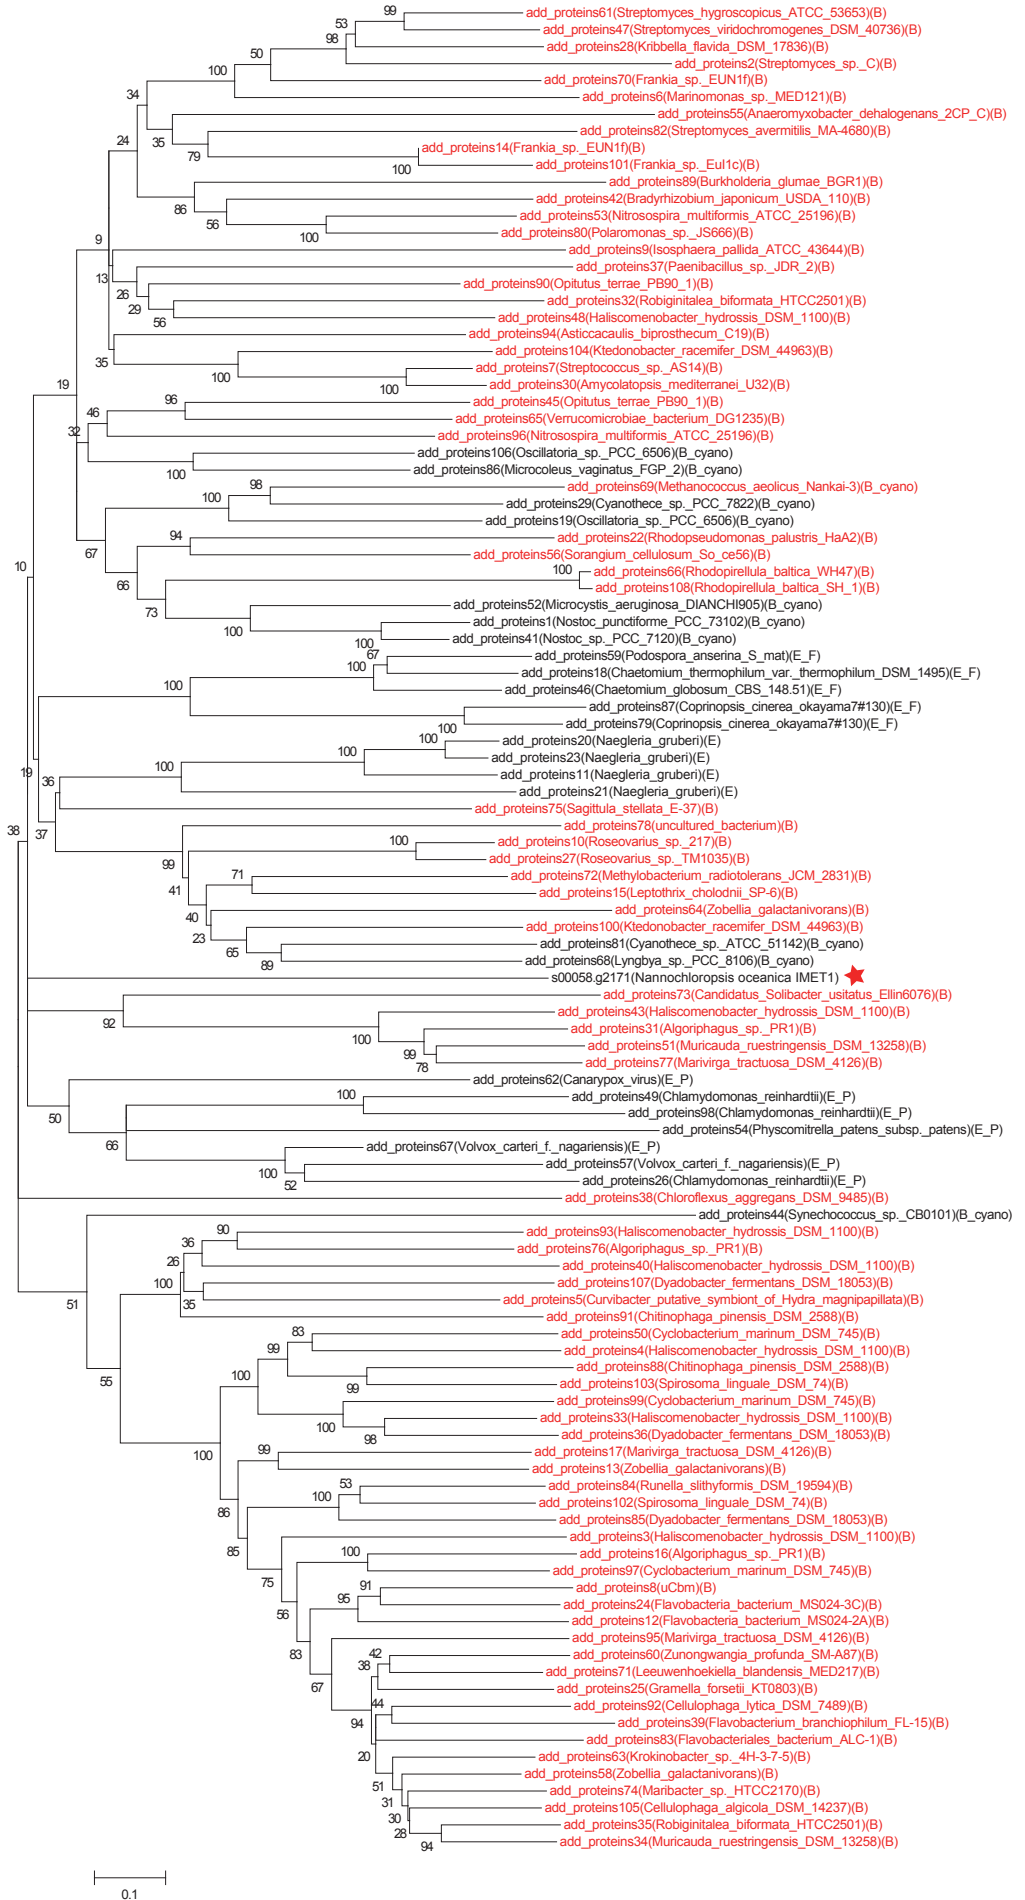



**F**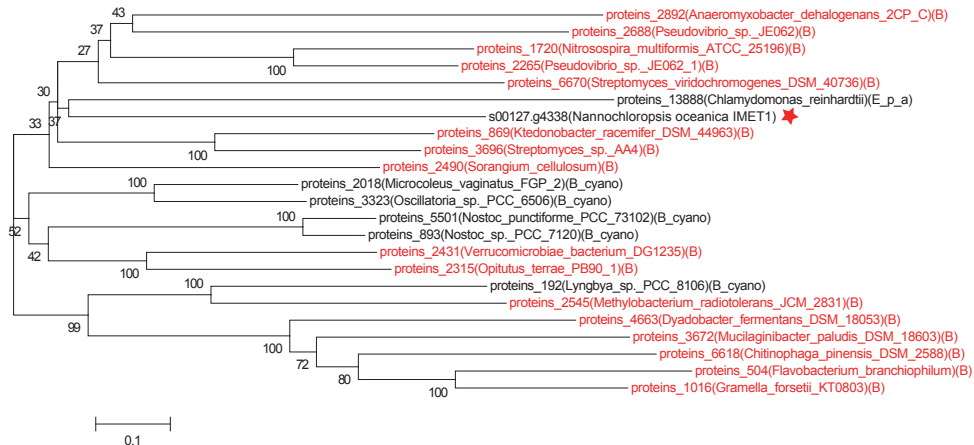

Supplement: pgen.1004094.s016.pdf [file pgen.1004094.s016.pdf]
