# Supplementary material for: Nannochloropsis Genomes Reveal Evolution of Microalgal Oleaginous Traits
Source: PubMed Central journal article supplement (PMC3886936; doi:10.1371/journal.pgen.1004094), 2014-01-09
Supplement: pgen.1004094.s017.pdf [file pgen.1004094.s017.pdf]

A

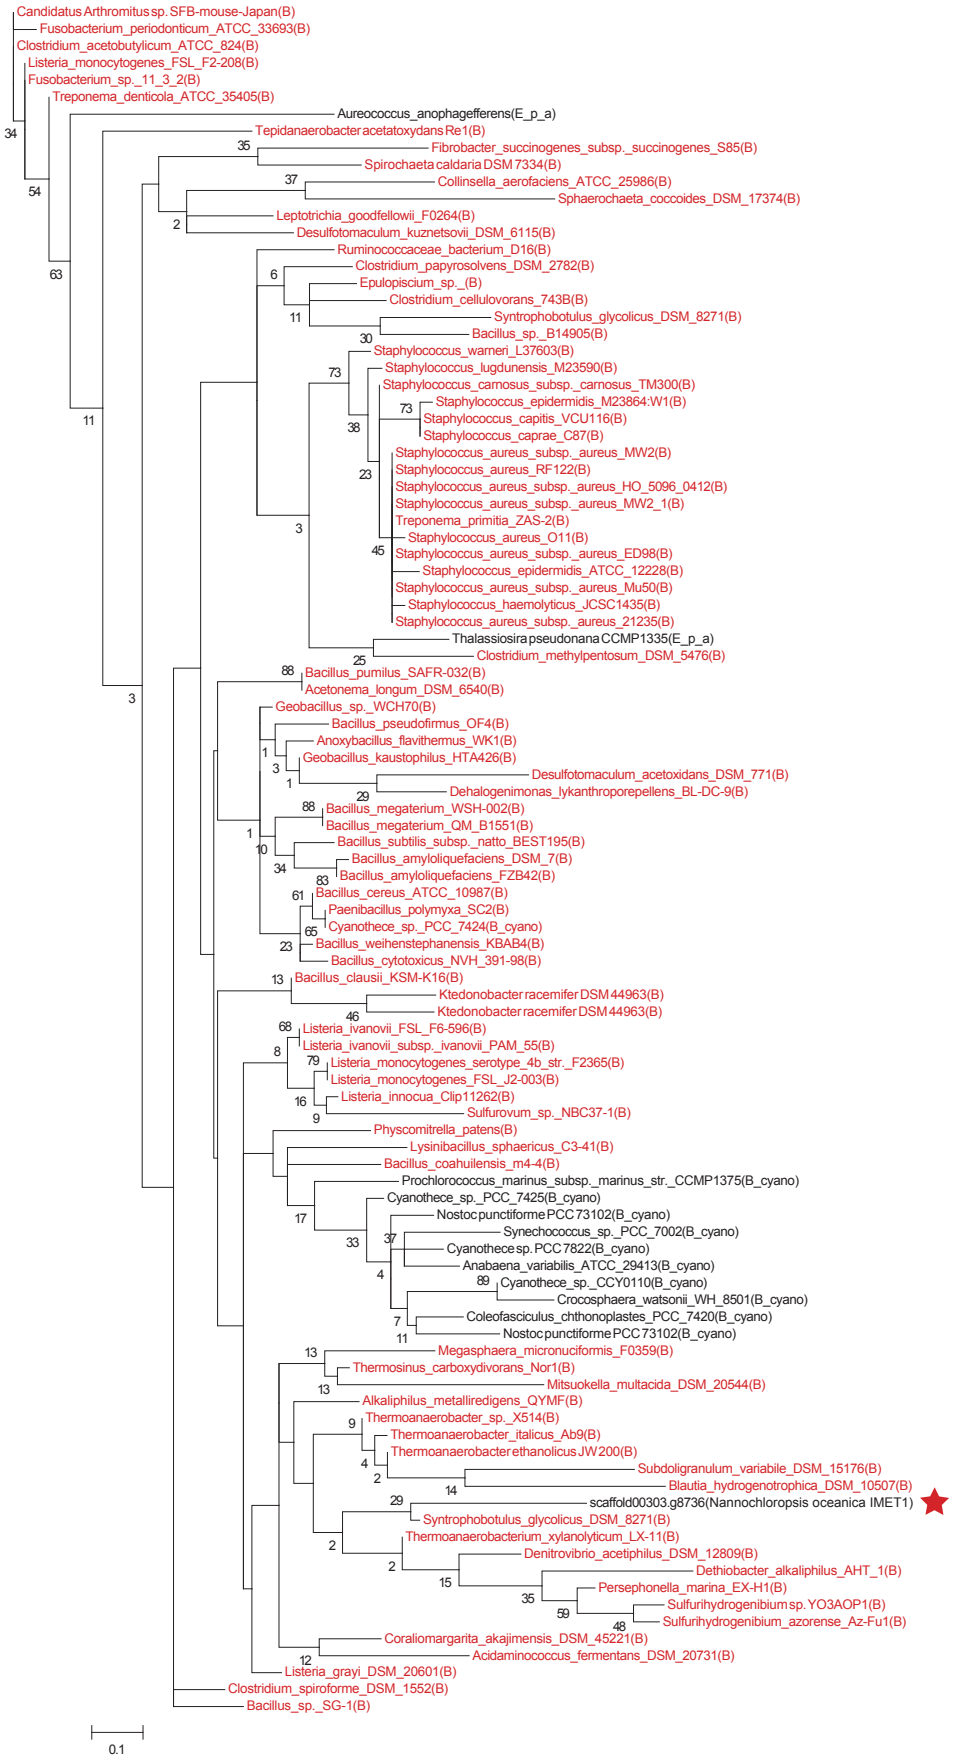

0.1

**B**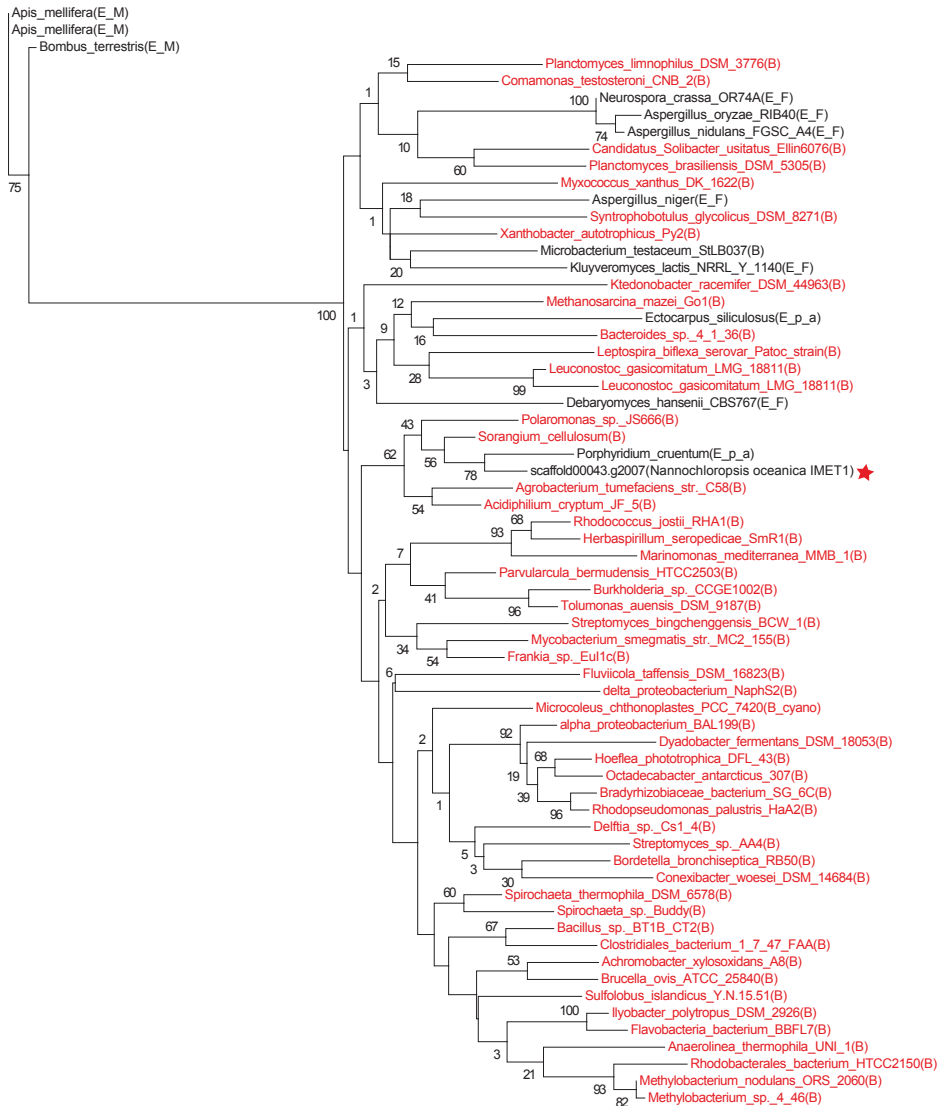

0.2

C

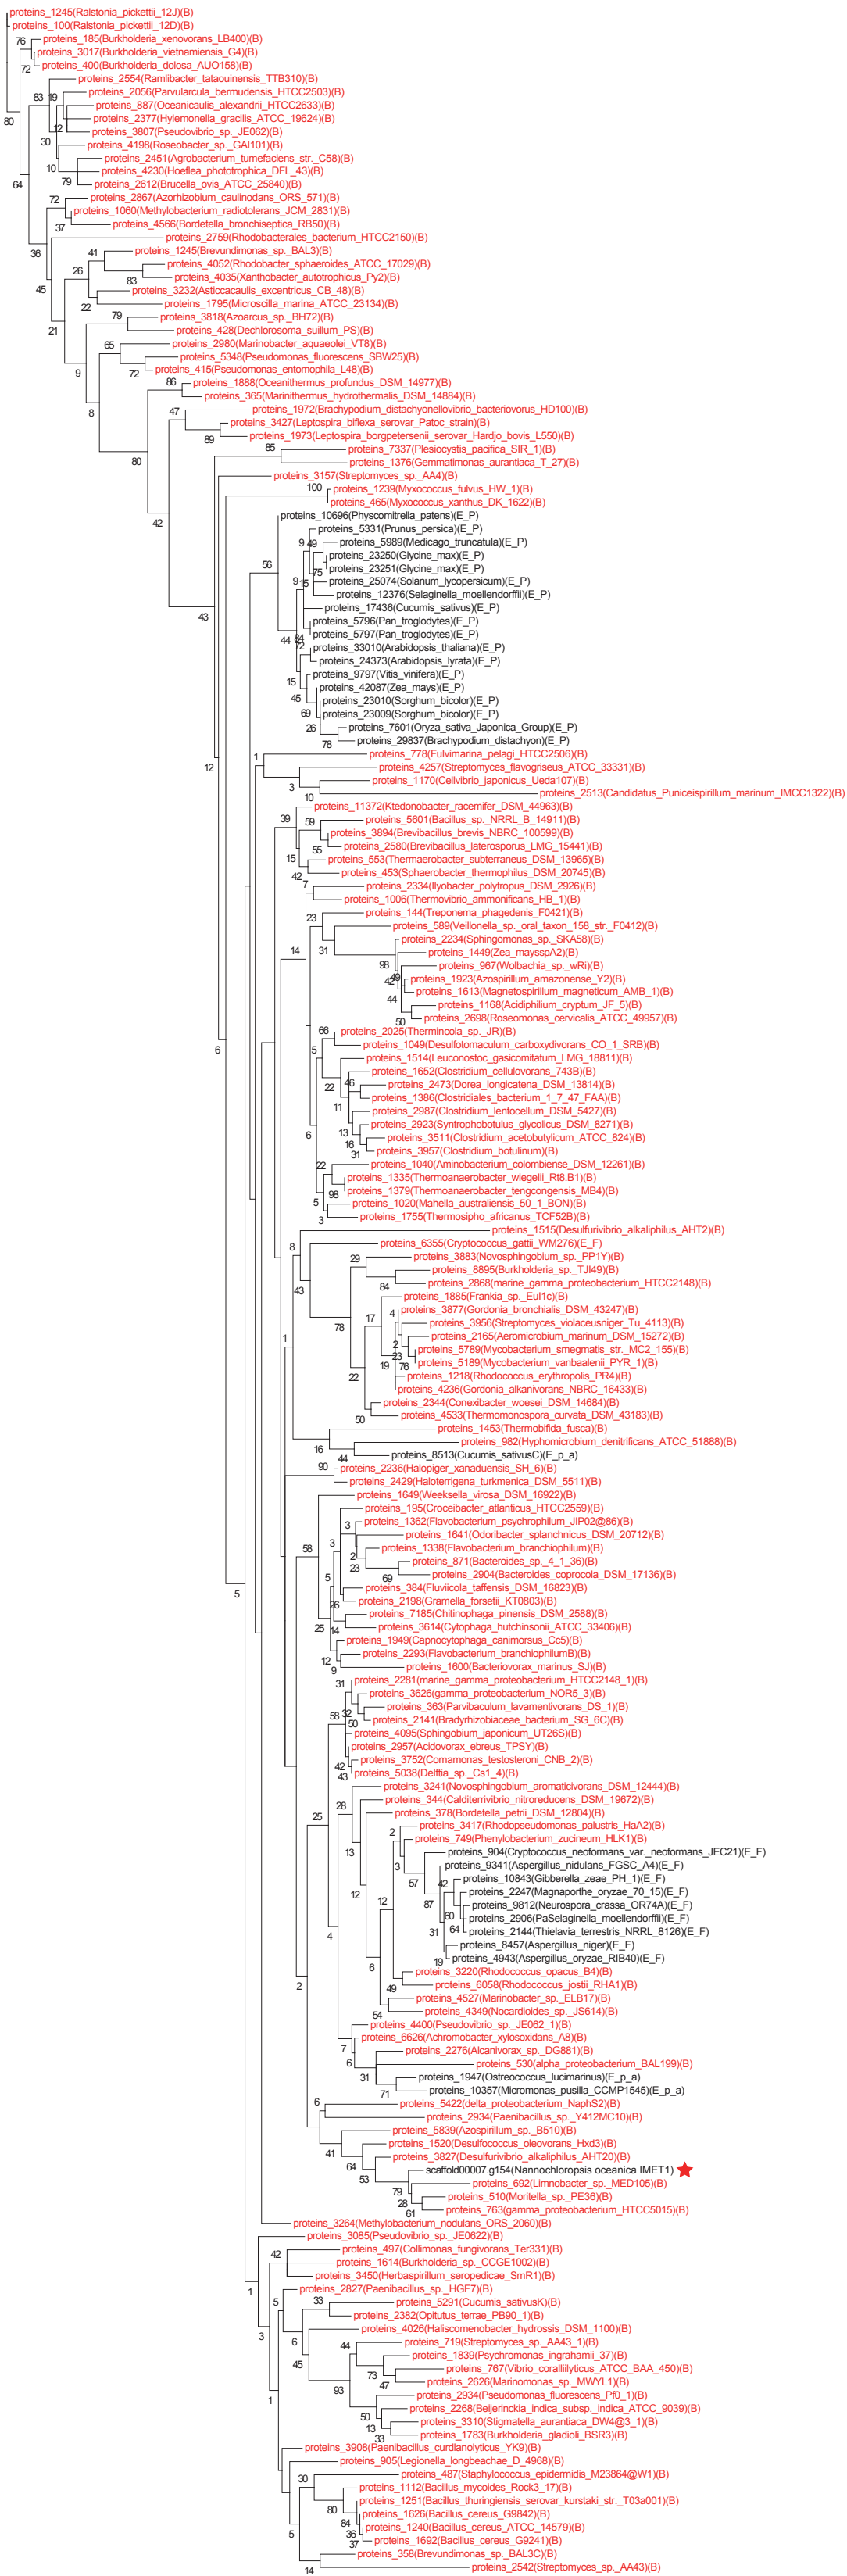

0.2

C

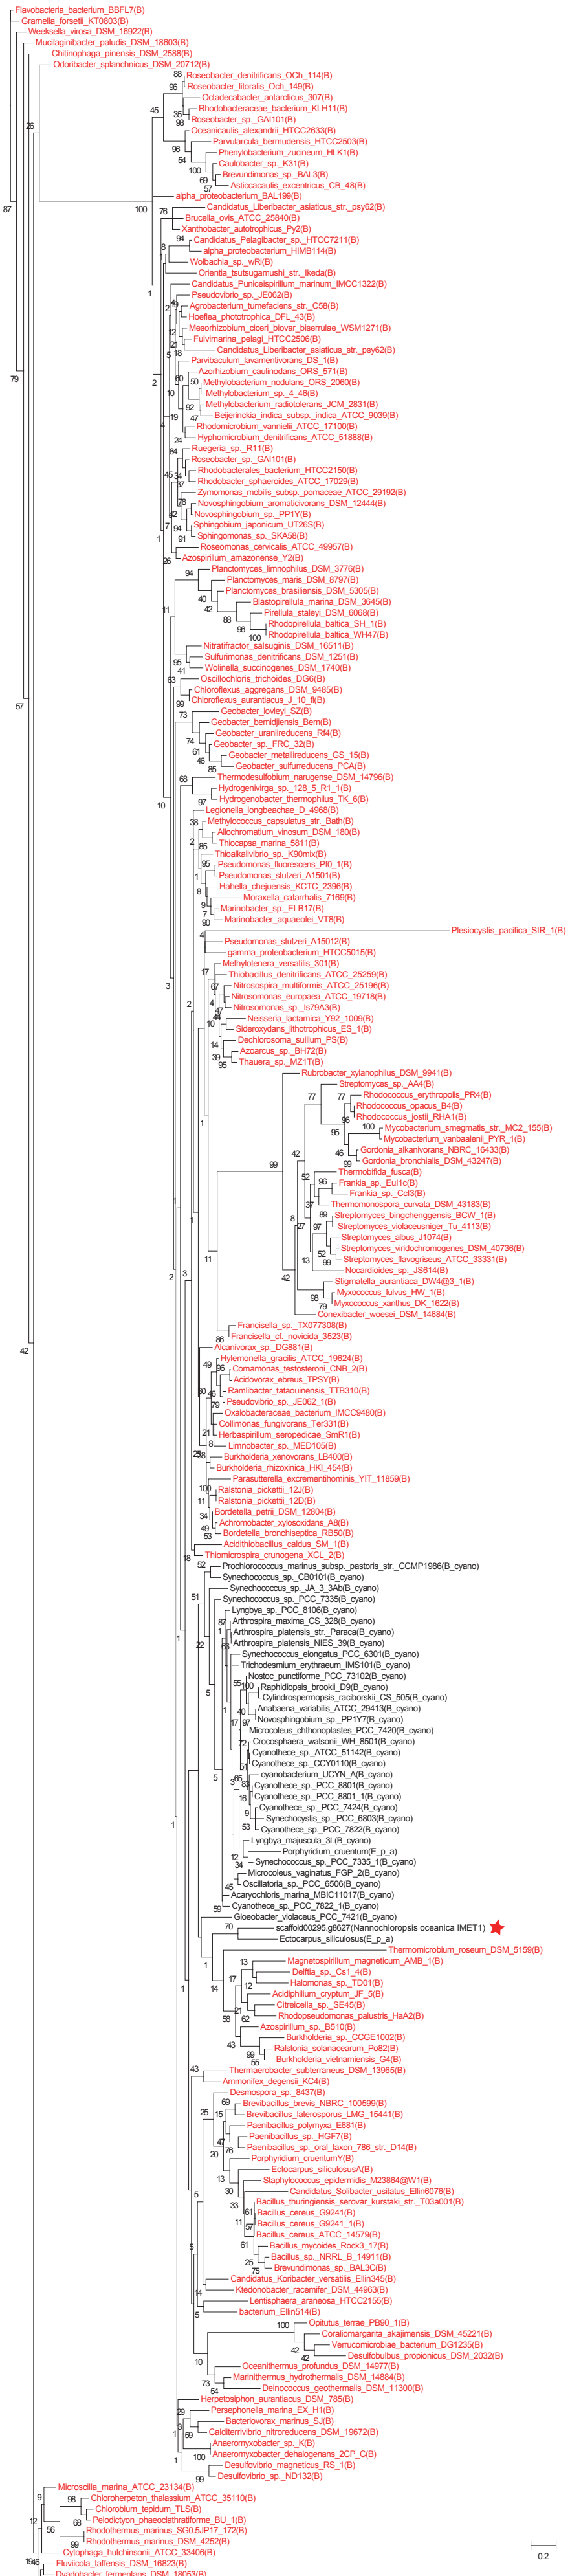

0.2

D

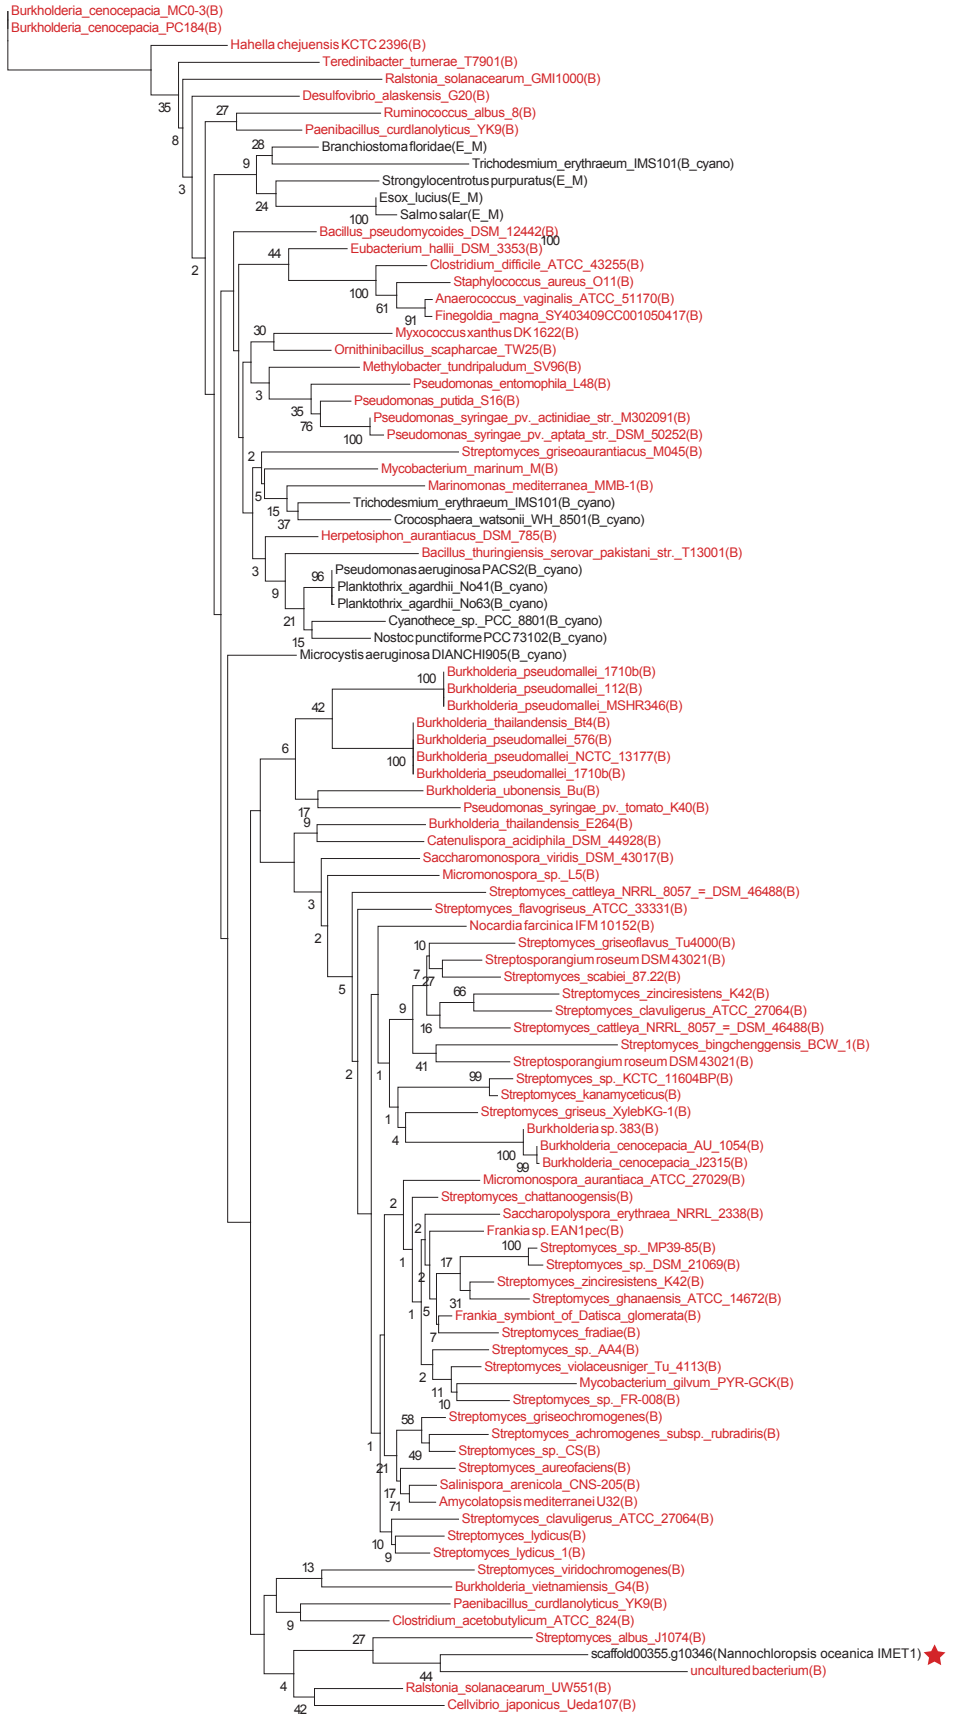

0.2



E

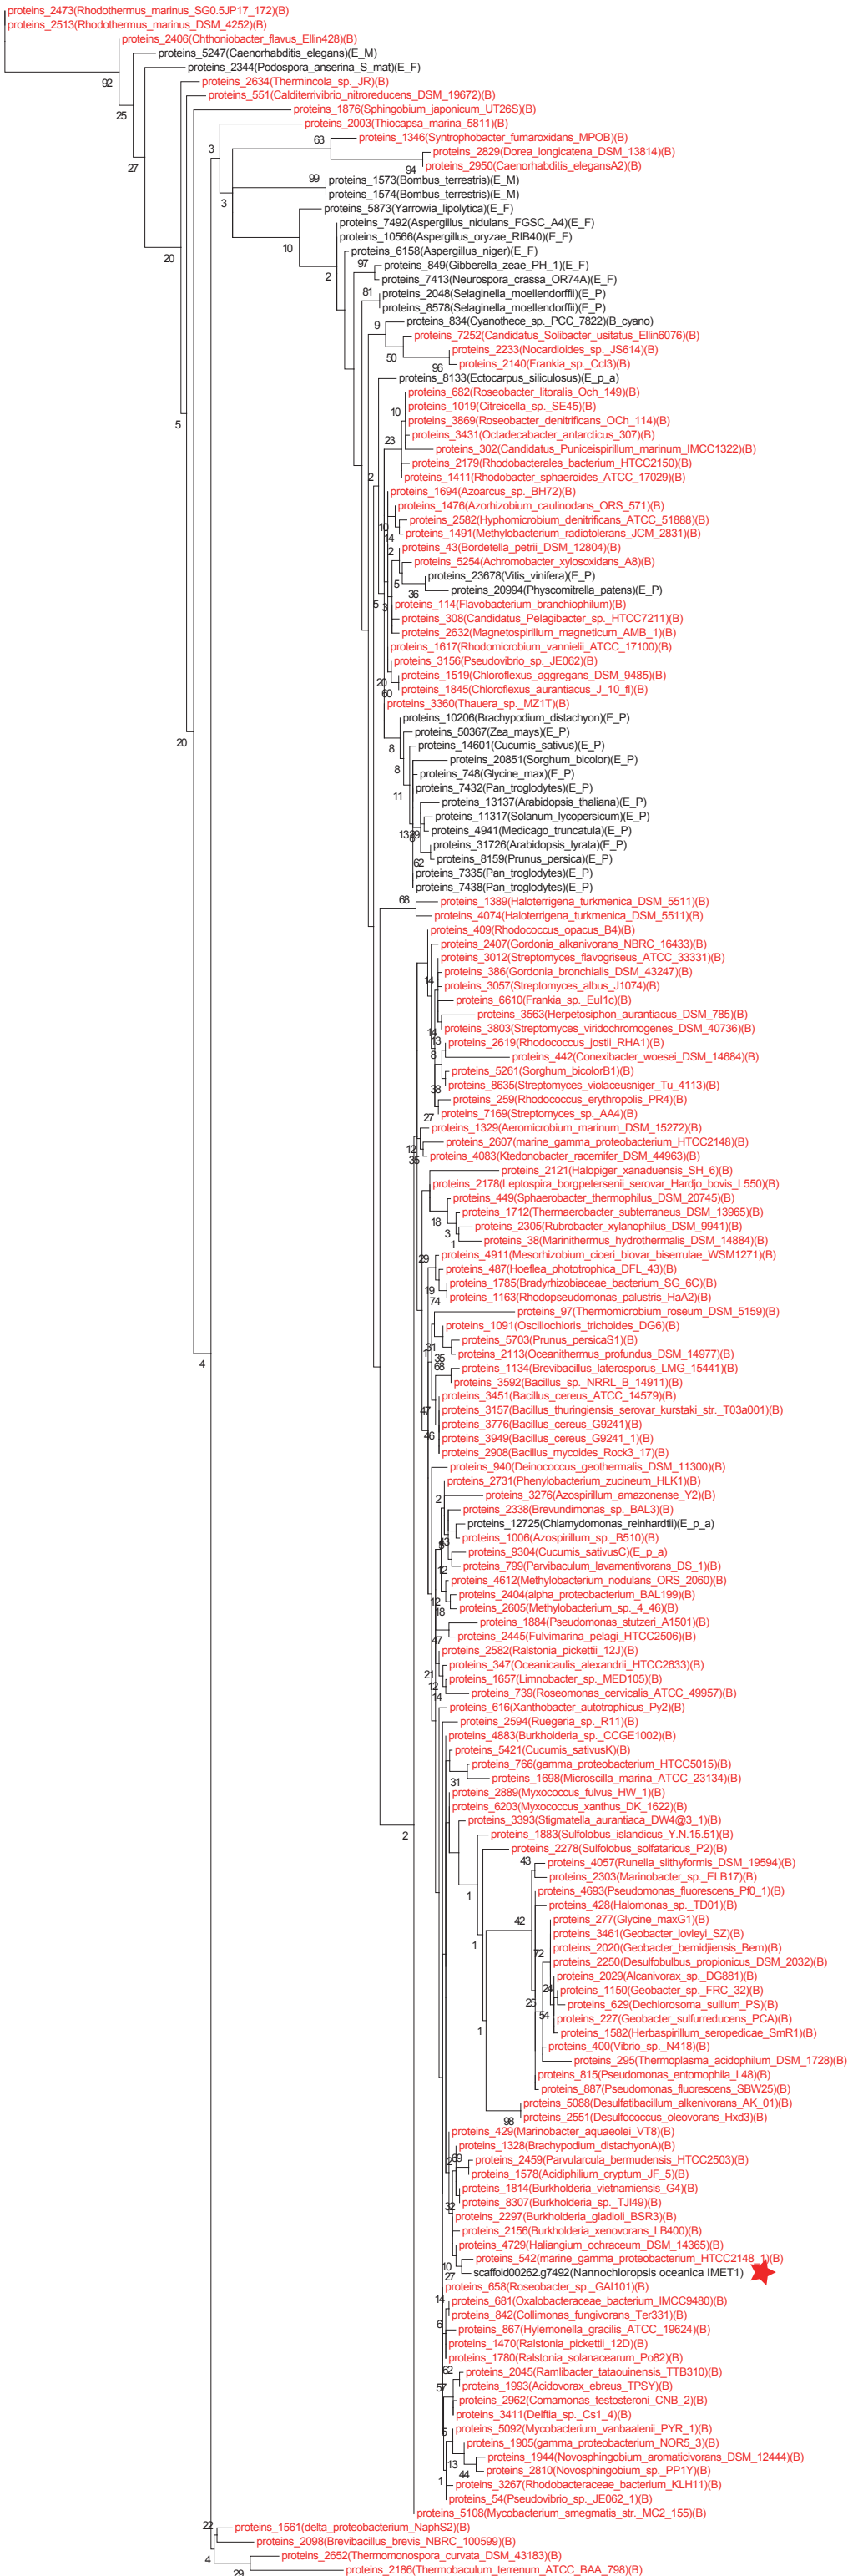

0.5

E

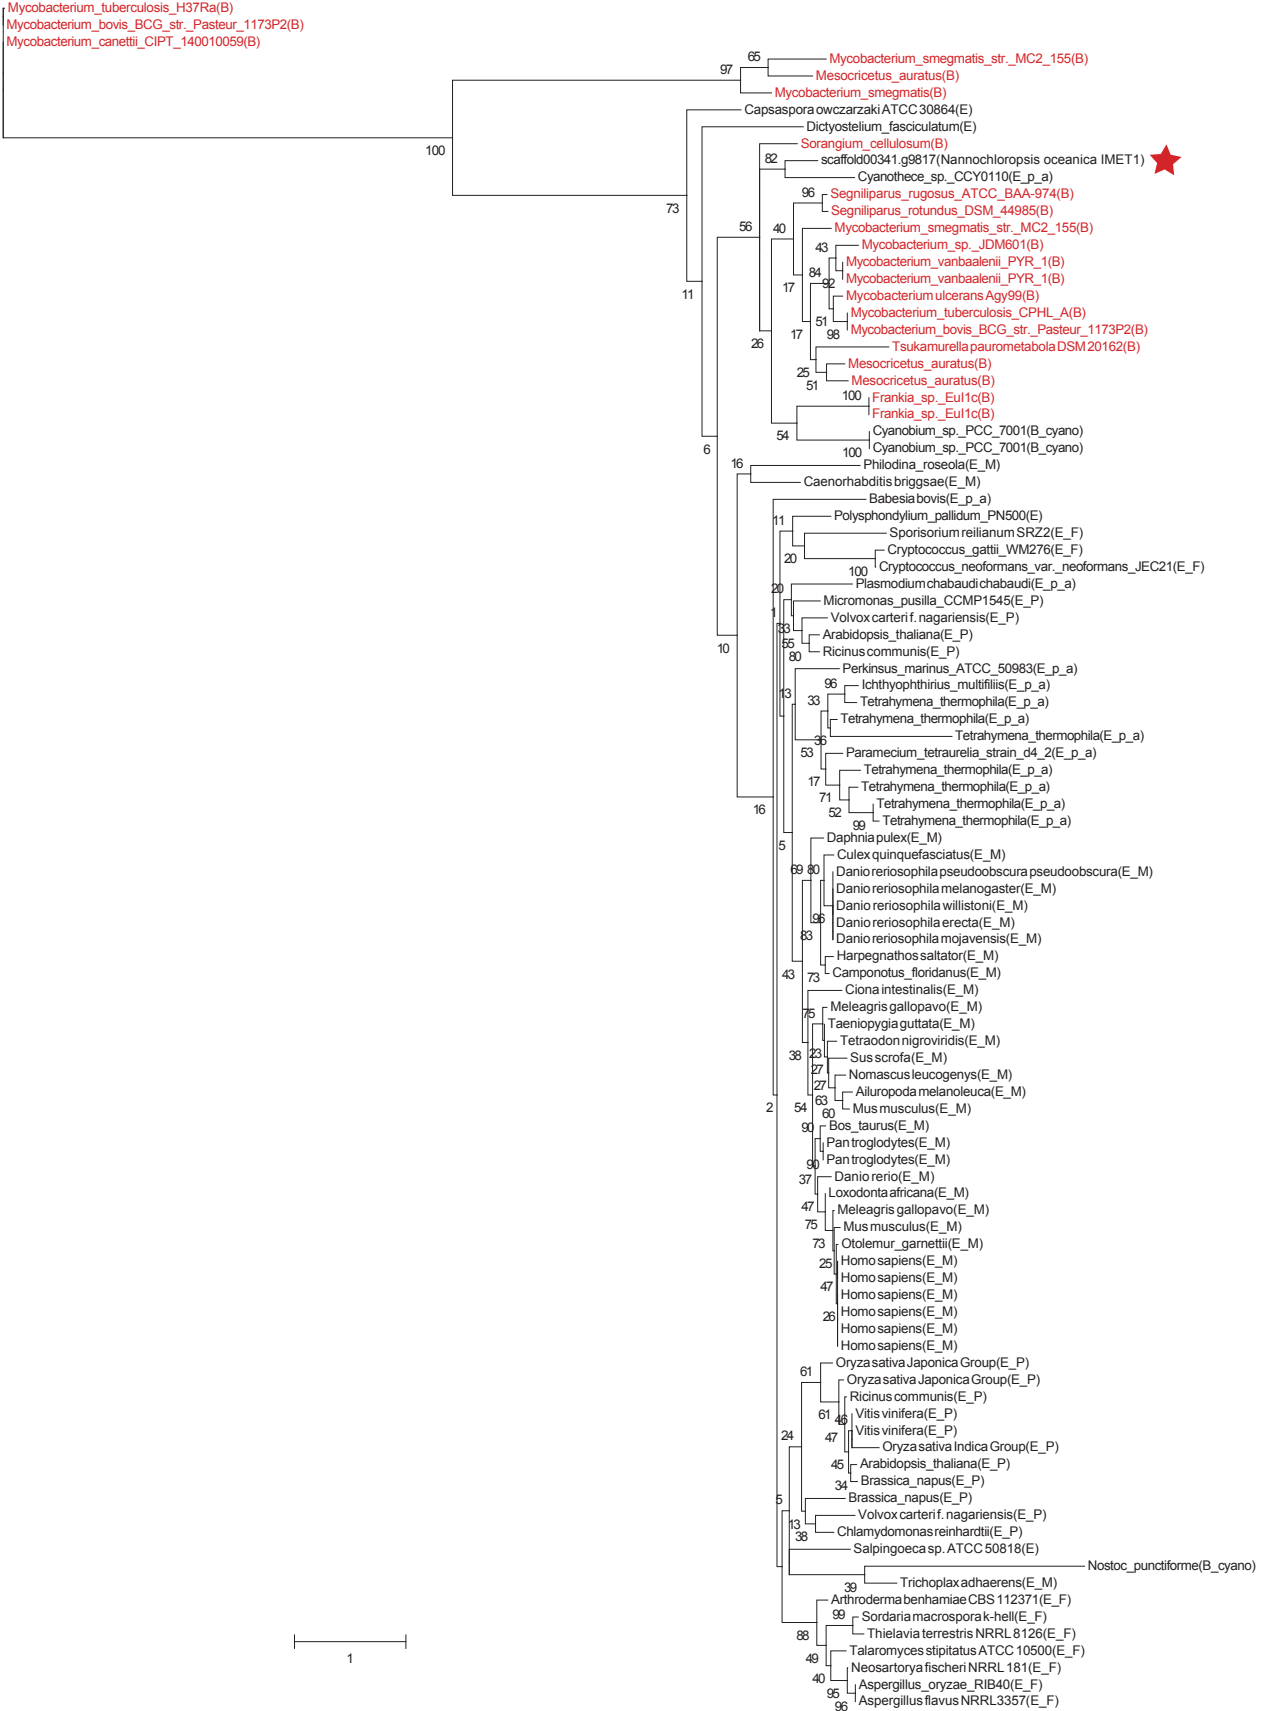

F

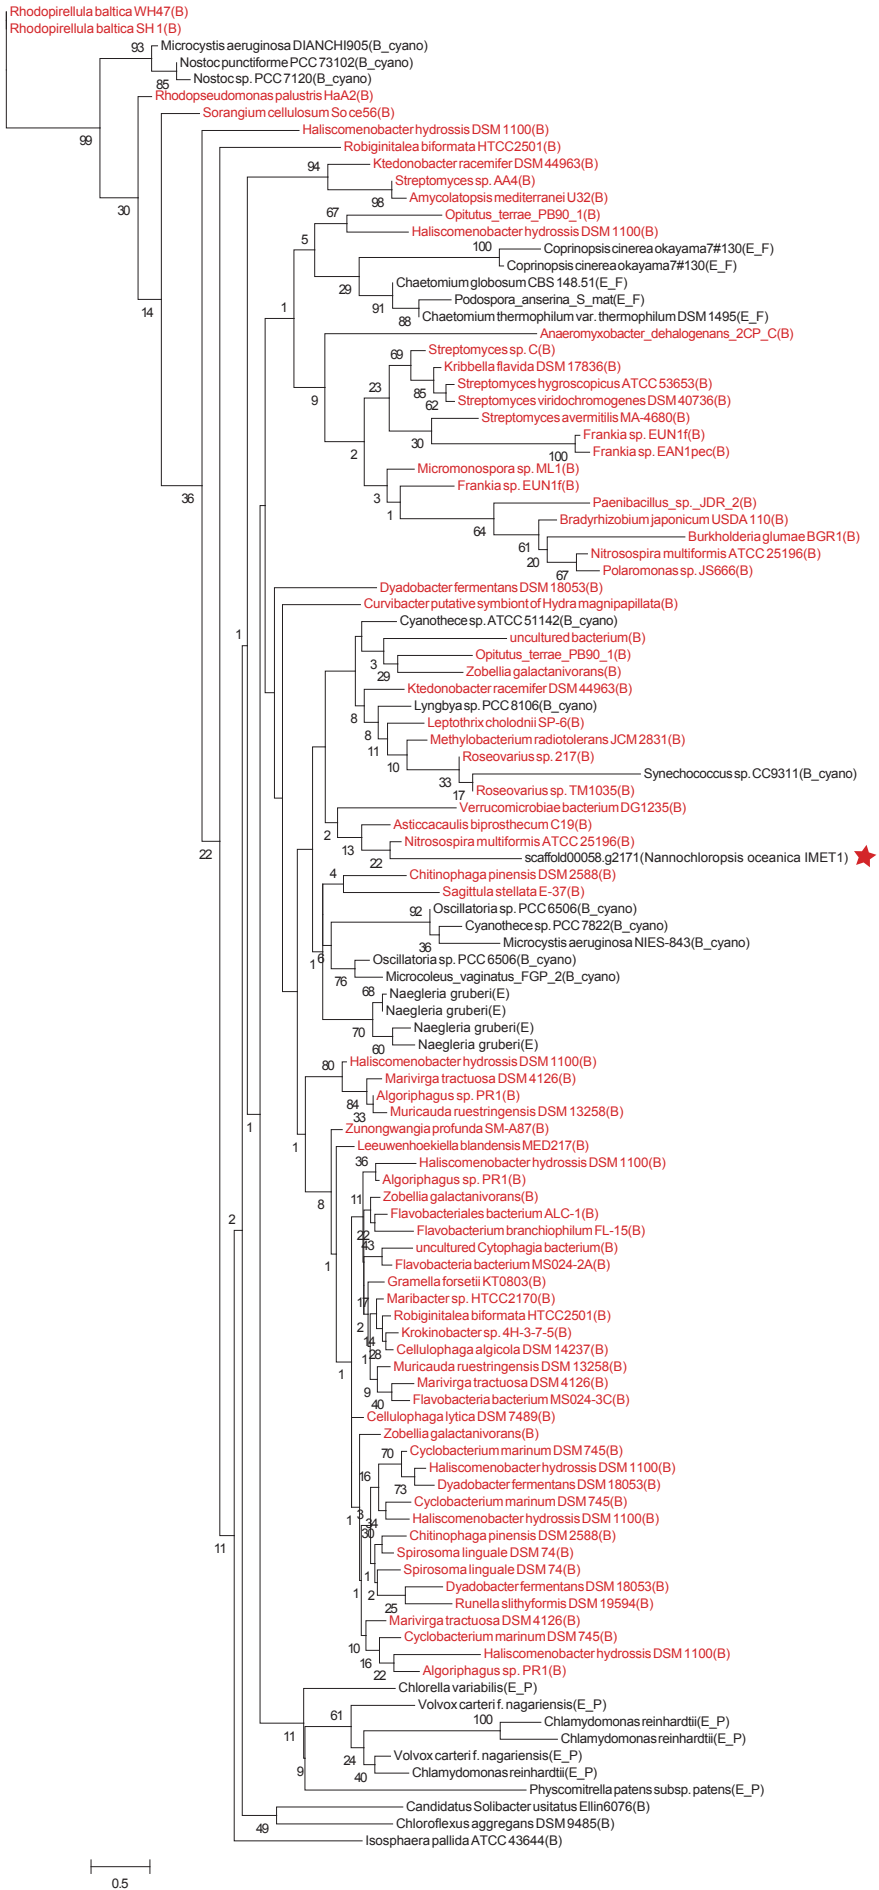



**F**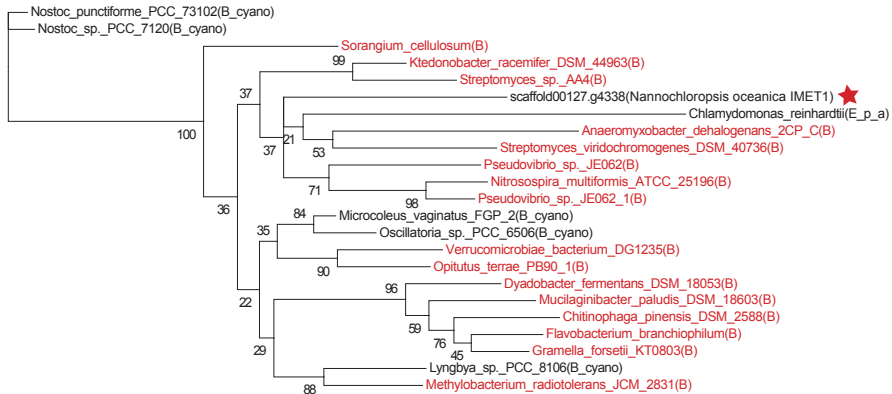

0.2
