# Supplementary material for: Nannochloropsis Genomes Reveal Evolution of Microalgal Oleaginous Traits
Source: PubMed Central journal article supplement (PMC3886936; doi:10.1371/journal.pgen.1004094), 2014-01-09

**A**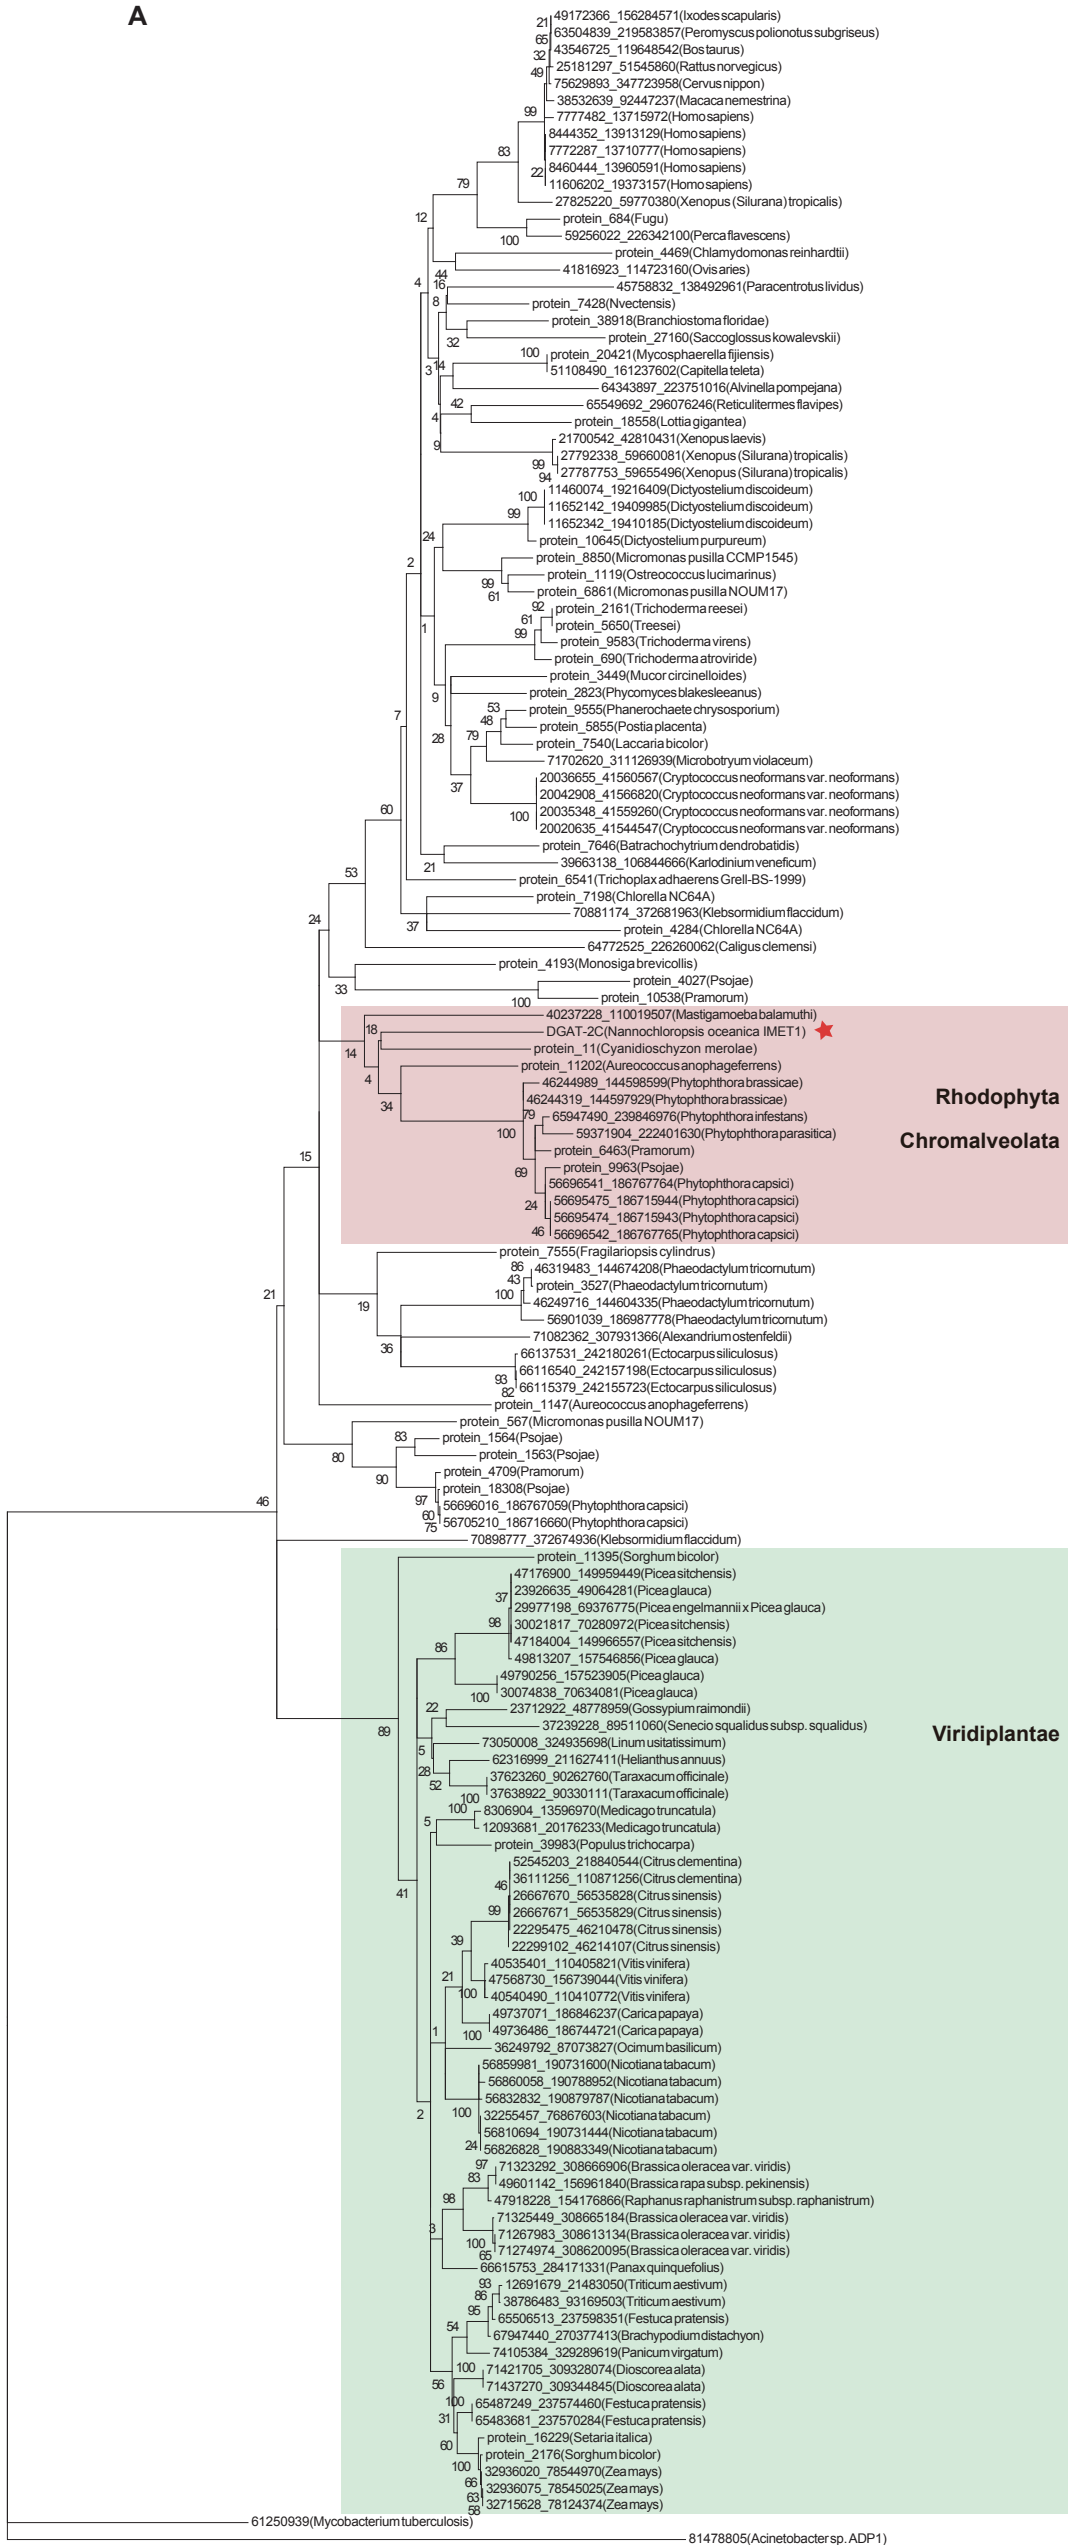



C

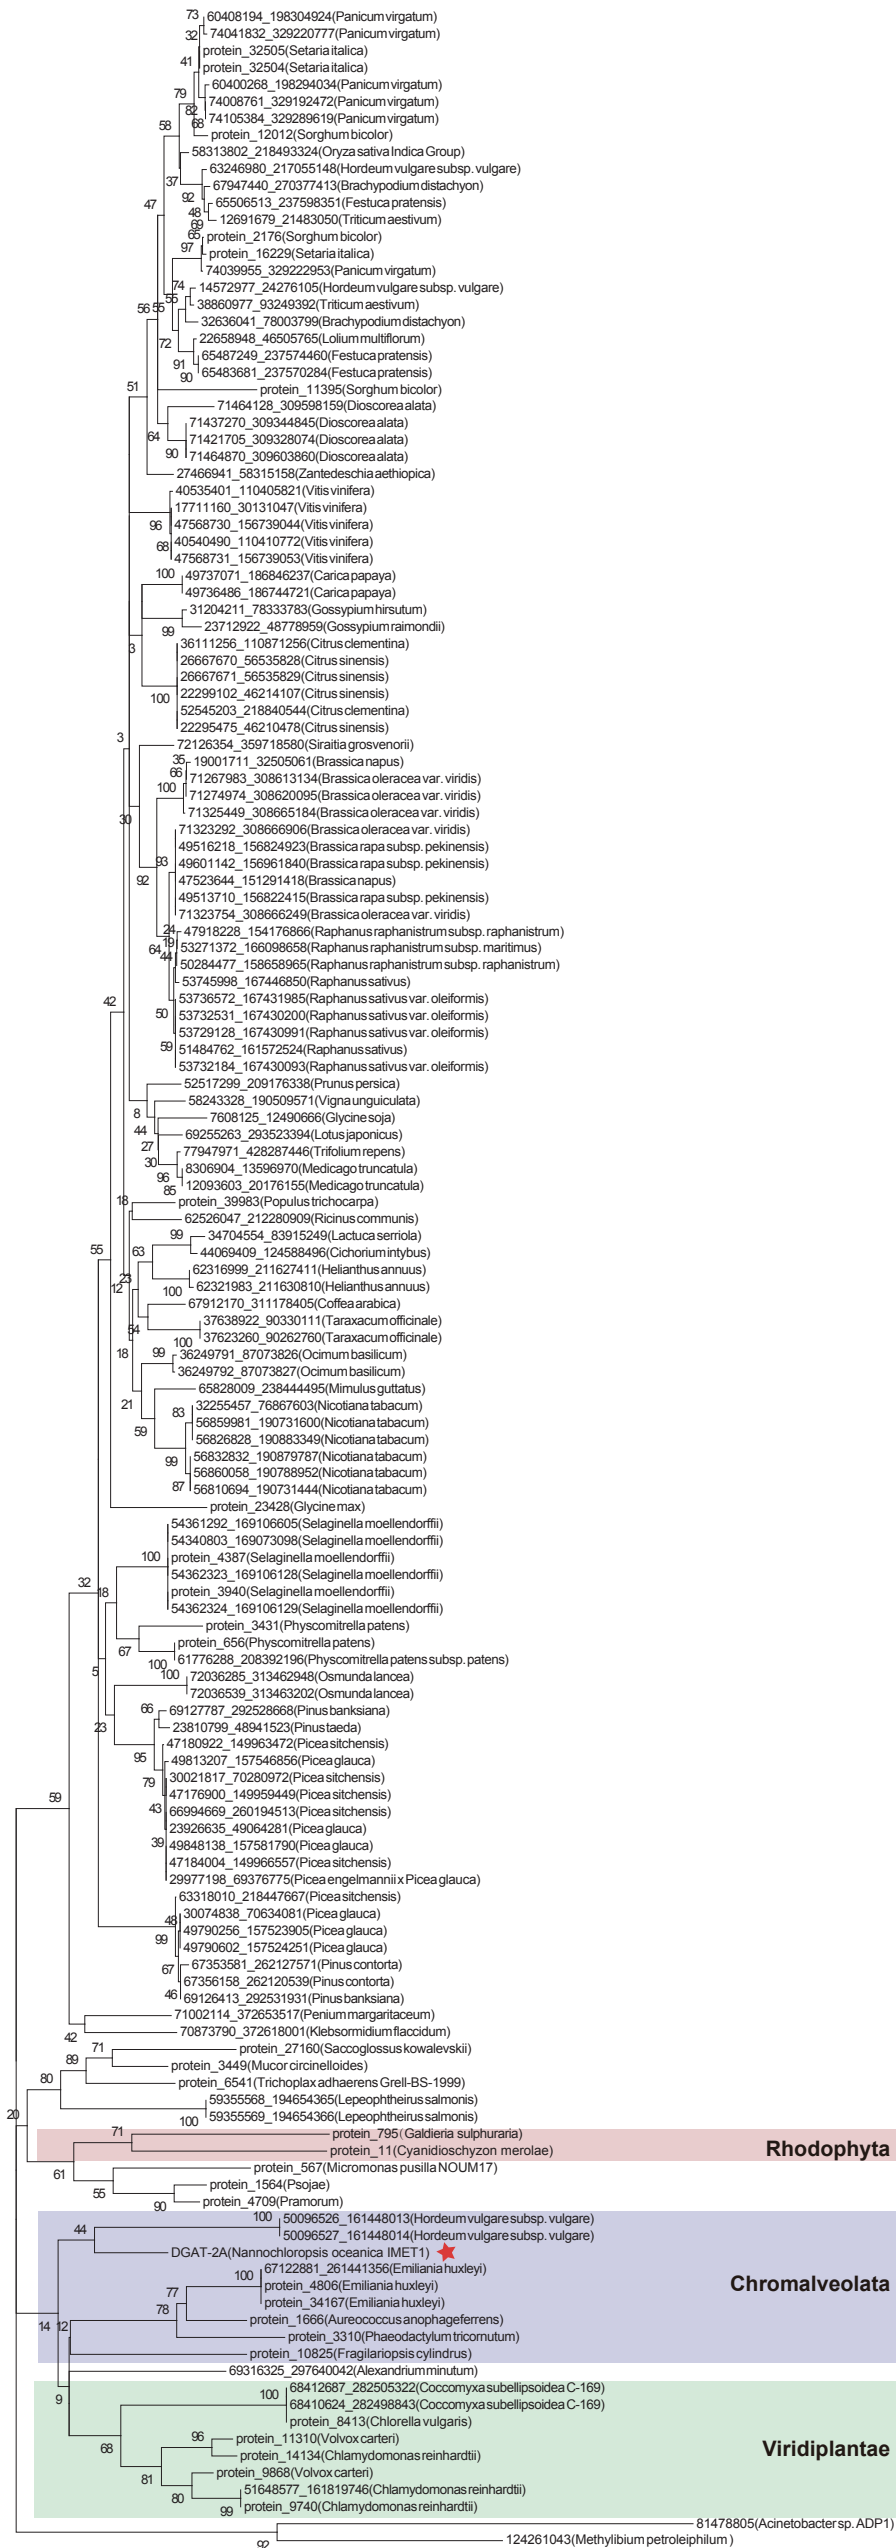

0.2

D

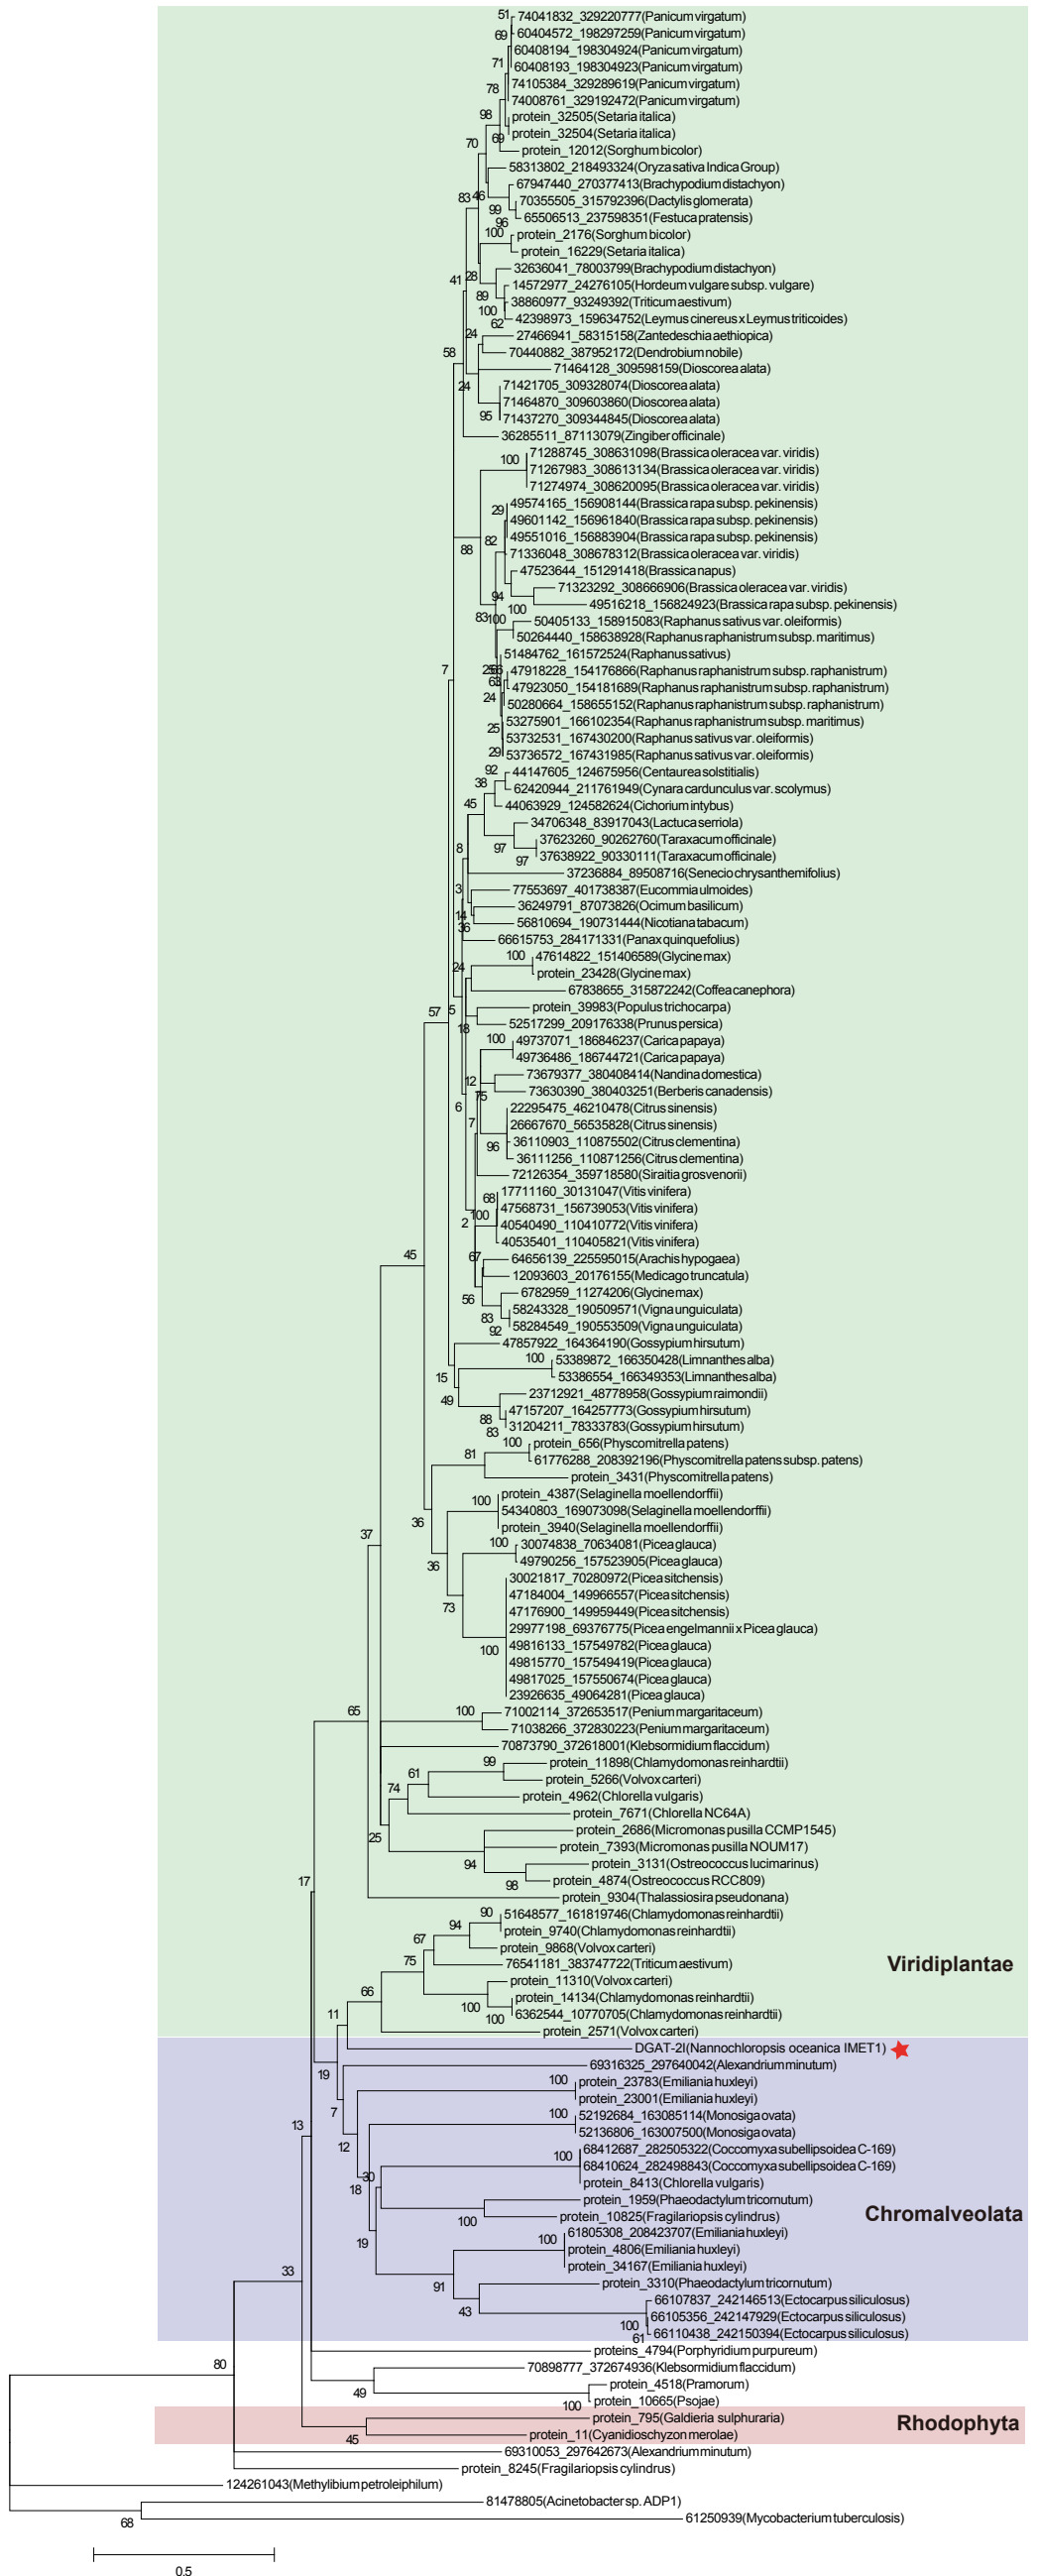

E

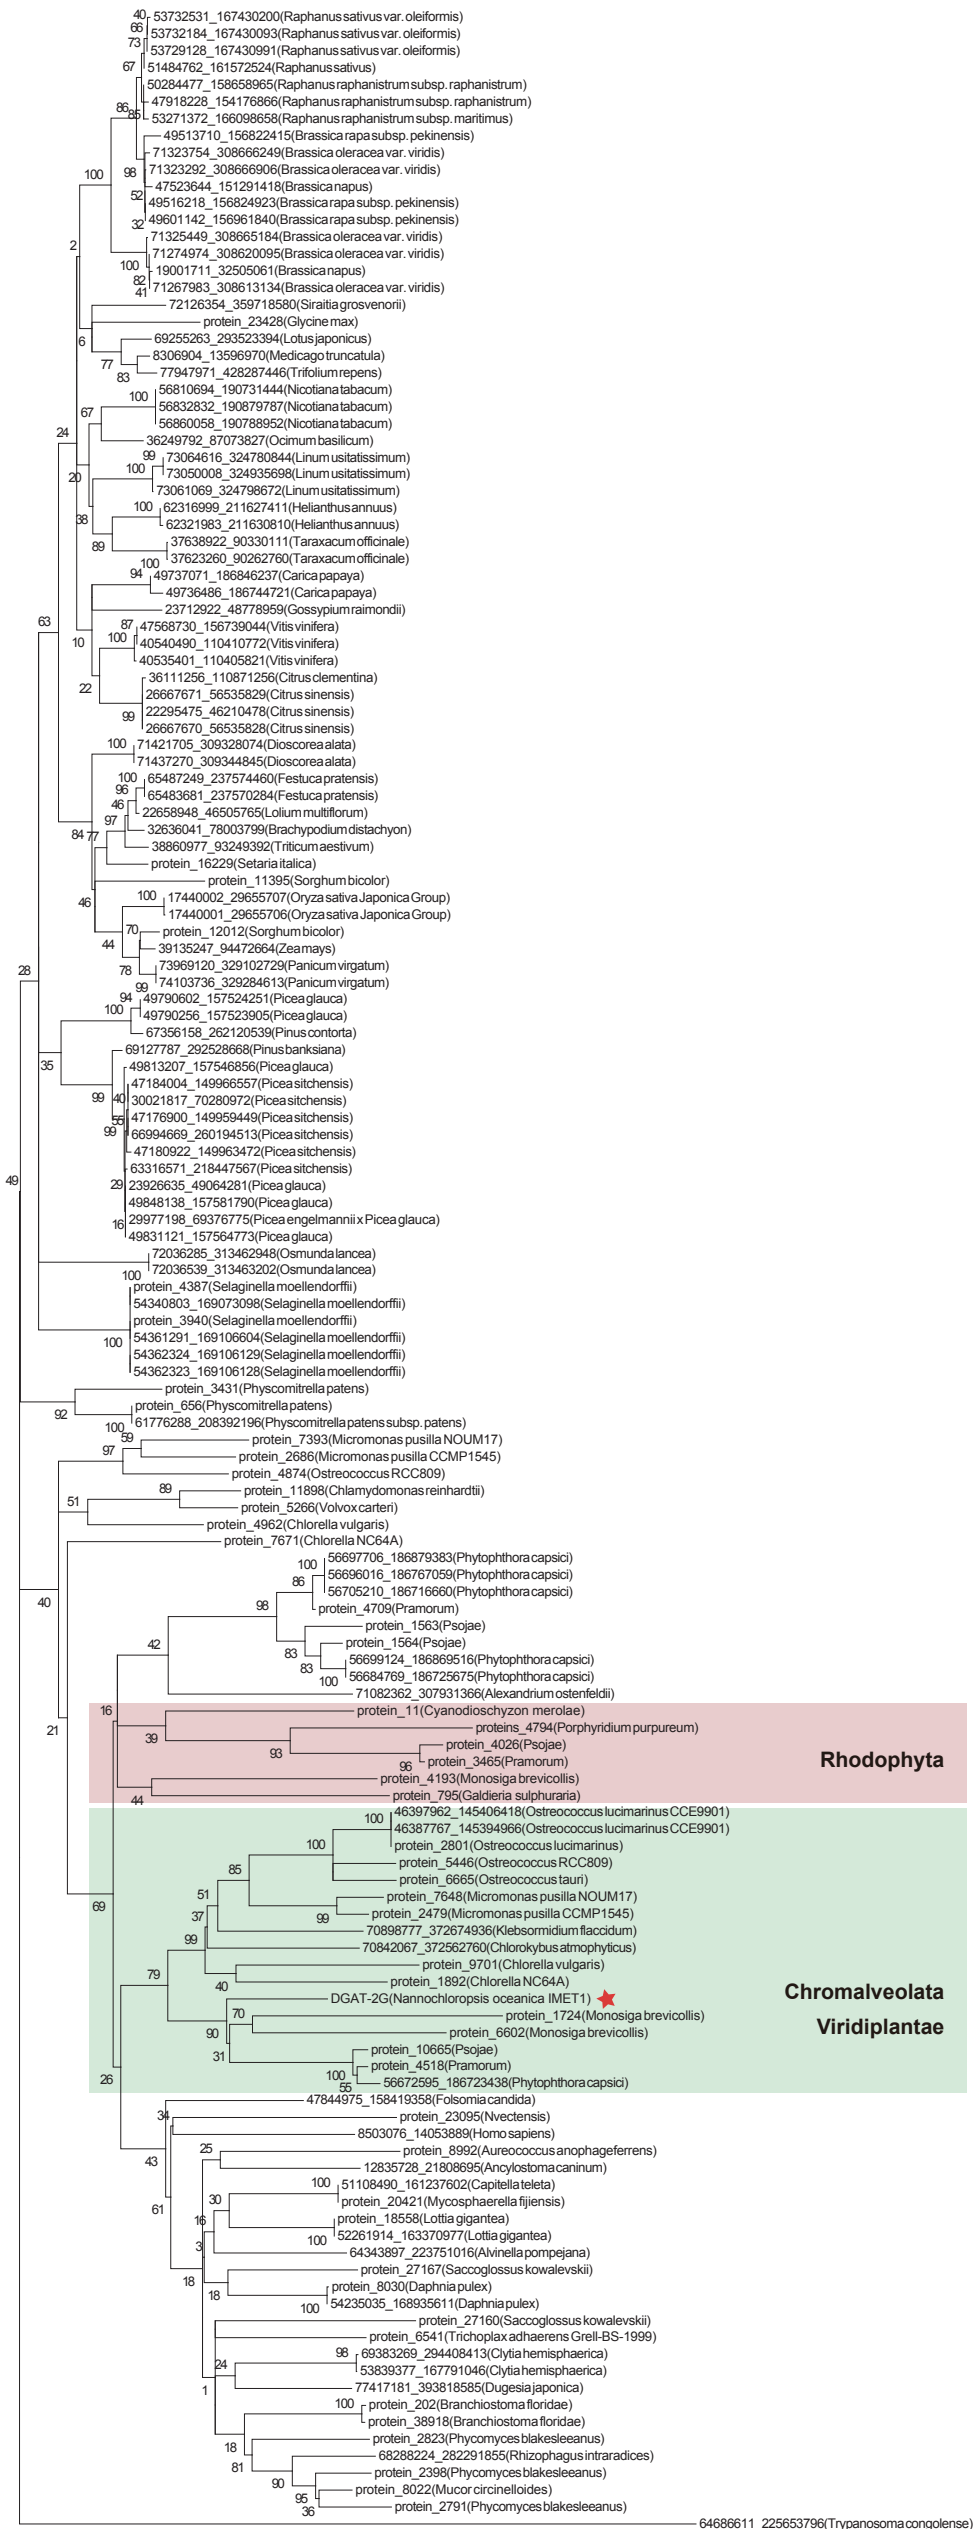

64686611\_225653796(Trypanosoma congolense)



F

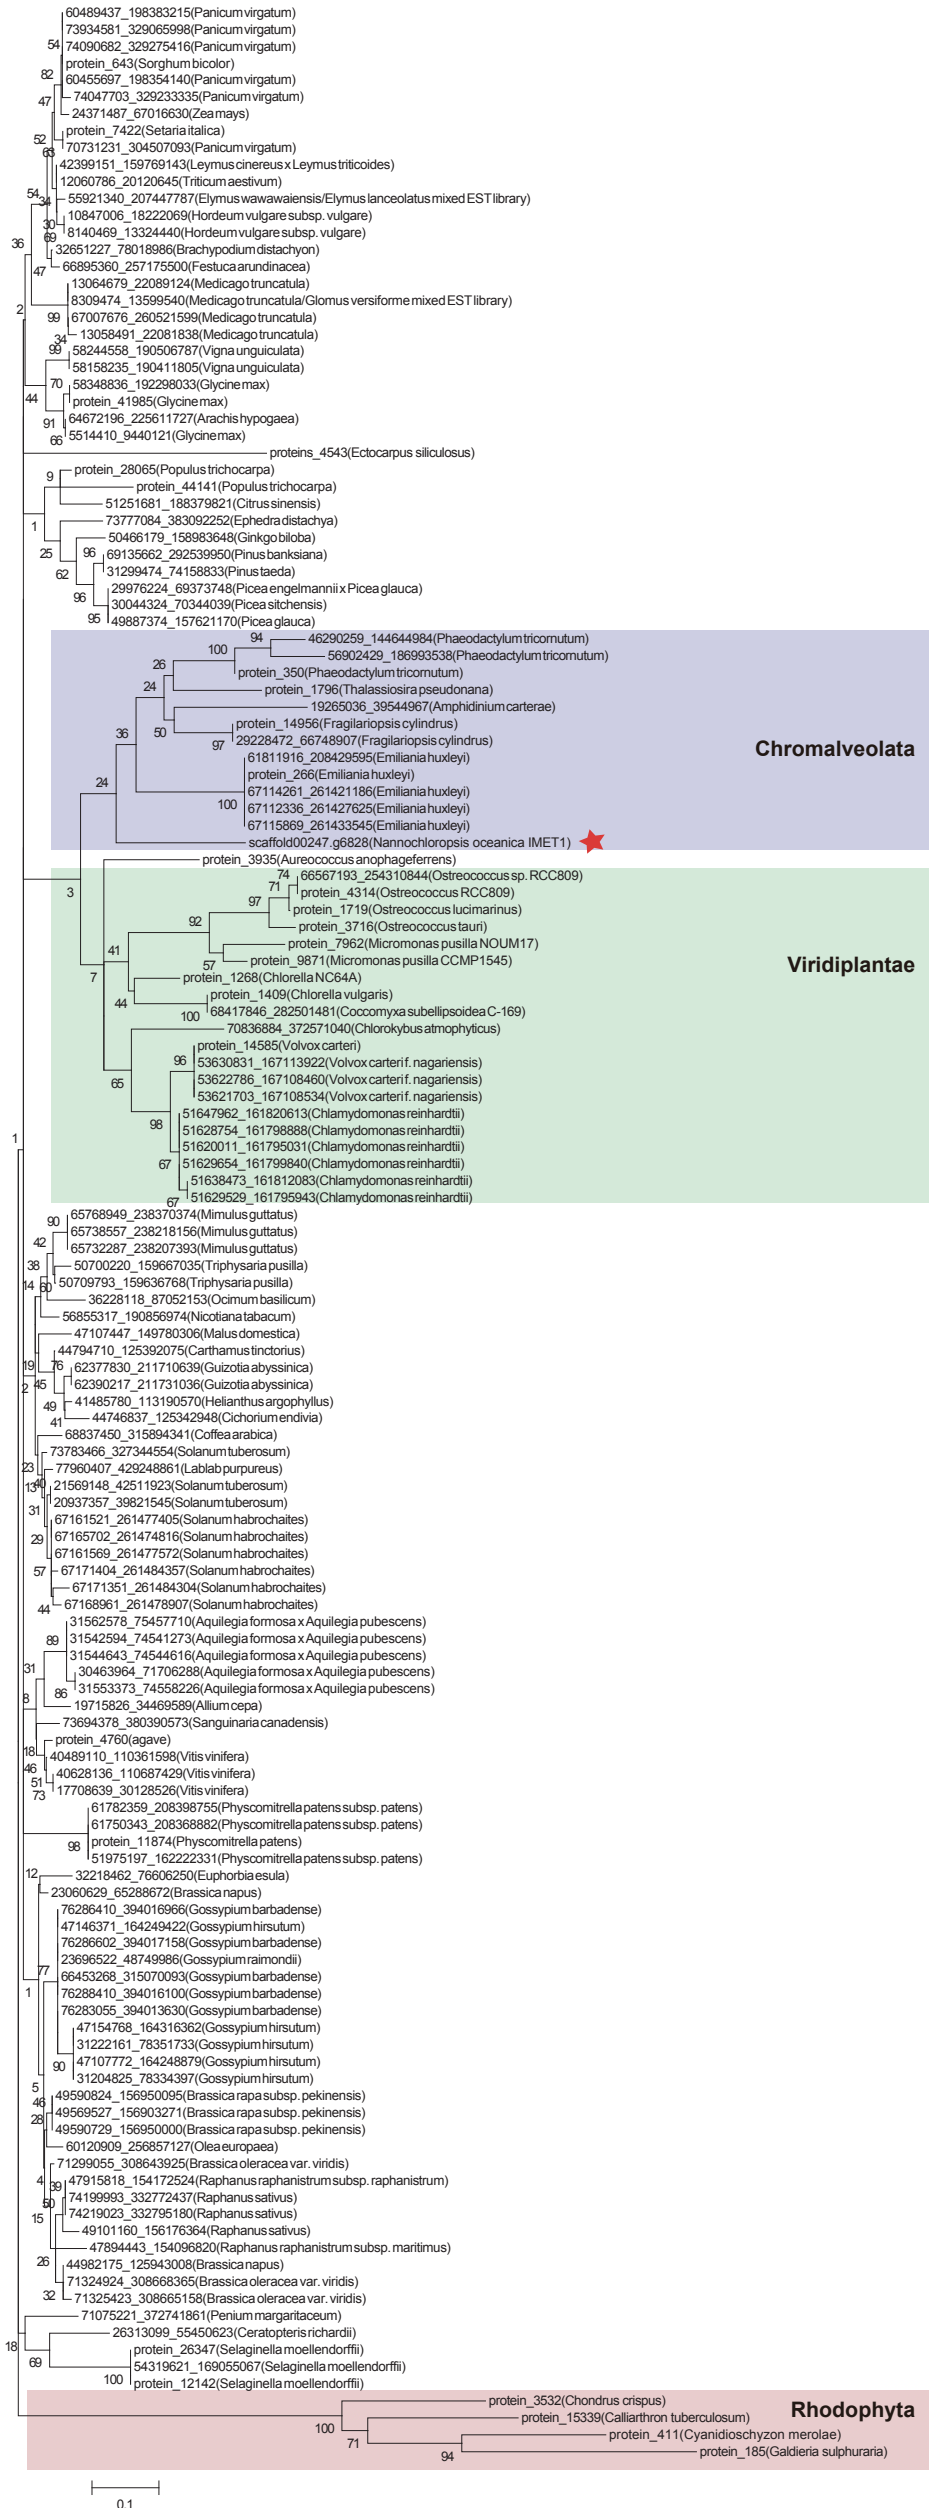

Supplement: pgen.1004094.s020.pdf [file pgen.1004094.s020.pdf]
